# Supplementary material for: Assessing care models implemented in primary healthcare for persons with dementia: a mixed-methods study protocol
Source: PubMed Central journal article supplement — BMJ Open. 2020 May 15;10(5):e035916. doi: 10.1136/bmjopen-2019-035916 (PMC7232631; doi:10.1136/bmjopen-2019-035916), 2020-05-15
Supplement: bmjopen-2019-035916.draft_revisions.pdf [file bmjopen-2019-035916.draft_revisions.pdf]

# BMJ Open

BMJ Open is committed to open peer review. As part of this commitment we make the peer review history of every article we publish publicly available.

When an article is published we post the peer reviewers' comments and the authors' responses online. We also post the versions of the paper that were used during peer review. These are the versions that the peer review comments apply to.

The versions of the paper that follow are the versions that were submitted during the peer review process. They are not the versions of record or the final published versions. They should not be cited or distributed as the published version of this manuscript.

BMJ Open is an open access journal and the full, final, typeset and author-corrected version of record of the manuscript is available on our site with no access controls, subscription charges or pay-per-view fees (<http://bmjopen.bmj.com>).

If you have any questions on BMJ Open's open peer review process please email [info.bmjopen@bmj.com](mailto:info.bmjopen@bmj.com)

# BMJ Open

## Assessing care models implemented in primary health care for persons with dementia : a mixed methods study

|                               |                                                                                                                                                                                                                                                                                                                                                                                                                                                                                                                                             |
|-------------------------------|---------------------------------------------------------------------------------------------------------------------------------------------------------------------------------------------------------------------------------------------------------------------------------------------------------------------------------------------------------------------------------------------------------------------------------------------------------------------------------------------------------------------------------------------|
| Journal:                      | <i>BMJ Open</i>                                                                                                                                                                                                                                                                                                                                                                                                                                                                                                                             |
| Manuscript ID                 | bmjopen-2019-035916                                                                                                                                                                                                                                                                                                                                                                                                                                                                                                                         |
| Article Type:                 | Protocol                                                                                                                                                                                                                                                                                                                                                                                                                                                                                                                                    |
| Date Submitted by the Author: | 27-Nov-2019                                                                                                                                                                                                                                                                                                                                                                                                                                                                                                                                 |
| Complete List of Authors:     | Vedel, Isabelle; McGill University, Family Medicine<br>McAiney, Carrie; University of Waterloo,<br>Couturier, Yves; Universite de Sherbrooke, social work<br>Pakzad, Sarah; University of Moncton, School of Psychology<br>Arsenault-Lapierre, Genevieve; Lady Davis Institute for Medical Research<br>Godard-Sebillotte, Claire; McGill University,<br>Sourial, Nadia; McGill University, Family Medicine; McGill University<br>Simmons, Rachel; McGill University, Family Medicine<br>Bergman, Howard; McGill University, Family Medicine |
| Keywords:                     | PRIMARY CARE, Dementia < NEUROLOGY, Health policy < HEALTH SERVICES ADMINISTRATION & MANAGEMENT                                                                                                                                                                                                                                                                                                                                                                                                                                             |
|                               |                                                                                                                                                                                                                                                                                                                                                                                                                                                                                                                                             |

SCHOLARONE™  
Manuscripts

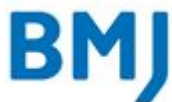

I, the Submitting Author has the right to grant and does grant on behalf of all authors of the Work (as defined in the below author licence), an exclusive licence and/or a non-exclusive licence for contributions from authors who are: i) UK Crown employees; ii) where BMJ has agreed a CC-BY licence shall apply, and/or iii) in accordance with the terms applicable for US Federal Government officers or employees acting as part of their official duties; on a worldwide, perpetual, irrevocable, royalty-free basis to BMJ Publishing Group Ltd ("BMJ") its licensees and where the relevant Journal is co-owned by BMJ to the co-owners of the Journal, to publish the Work in this journal and any other BMJ products and to exploit all rights, as set out in our [licence](#).

The Submitting Author accepts and understands that any supply made under these terms is made by BMJ to the Submitting Author unless you are acting as an employee on behalf of your employer or a postgraduate student of an affiliated institution which is paying any applicable article publishing charge ("APC") for Open Access articles. Where the Submitting Author wishes to make the Work available on an Open Access basis (and intends to pay the relevant APC), the terms of reuse of such Open Access shall be governed by a Creative Commons licence – details of these licences and which [Creative Commons](#) licence will apply to this Work are set out in our licence referred to above.

Other than as permitted in any relevant BMJ Author's Self Archiving Policies, I confirm this Work has not been accepted for publication elsewhere, is not being considered for publication elsewhere and does not duplicate material already published. I confirm all authors consent to publication of this Work and authorise the granting of this licence.

## ASSESSING CARE MODELS IMPLEMENTED IN PRIMARY HEALTH CARE FOR PERSONS WITH DEMENTIA: A MIXED METHODS STUDY

Authors:

Isabelle Vedel\*, MD, PhD, McGill University, Department of Family Medicine, [isabelle.vedel@mcgill.ca](mailto:isabelle.vedel@mcgill.ca)

\*Corresponding Author

Carrie McAiney, MA, PhD, University of Waterloo, School of Public Health and Health Systems and Schlegel-UW Research Institute for Aging [carrie.mcainey@uwaterloo.ca](mailto:carrie.mcainey@uwaterloo.ca)

Yves Couturier, PhD, University of Sherbrooke, Département de travail social, [yves.couturier@usherbrooke.ca](mailto:yves.couturier@usherbrooke.ca)

Sarah Pakzad, PhD, Moncton University, School of Psychology, [sarah.pakzad@umoncton.ca](mailto:sarah.pakzad@umoncton.ca)

Geneviève Arsenault-Lapierre, PhD, Lady Davis Institute, Jewish General Hospital, [genevieve.arsenault-lapierre@mail.mcgill.ca](mailto:genevieve.arsenault-lapierre@mail.mcgill.ca)

Claire Godard-Sebillotte, MD, McGill University, Department of Family Medicine, [claire.godard-sebillotte@mail.mcgill.ca](mailto:claire.godard-sebillotte@mail.mcgill.ca)

Nadia Sourial, MSc, McGill University, Department of Family Medicine, [nadia.sourial@mail.mcgill.ca](mailto:nadia.sourial@mail.mcgill.ca)

Rachel Simmons, MSc, McGill University, Department of Family Medicine, [rachel.simmons@mcgill.ca](mailto:rachel.simmons@mcgill.ca)

Howard Bergman, MD, McGill University, Department of Family Medicine, [howard.bergman@mcgill.ca](mailto:howard.bergman@mcgill.ca)

Research on the Organization of healthcare Services for Alzheimer's (ROSA) Team\*\*

[equiperosateam-admin.fammed@mcgill.ca](mailto:equiperosateam-admin.fammed@mcgill.ca)

\*\*individual authors listed in Acknowledgements under collaborating authors.

**Word Count : 3925**

## ABSTRACT

**Introduction:** Dementia is on the rise in Canada and globally. Ensuring accessibility to diagnosis, treatment and management throughout the course of the disease is a very significant problem worldwide. In order to provide comprehensive care to patients and their caregivers, enhancing primary care-based dementia care is seen as the way forward. In many Canadian provinces various collaborative care models and innovative interventions anchored in primary care to improve dementia care have been developed and implemented. The overall objective of our research program is to identify key factors for good quality of dementia care and successful collaborative care model implementation, and to facilitate dissemination and scale up of dementia best practices.

**Methods and Analysis:** We will use a convergent mixed methods design. An observational study using chart review and surveys and a qualitative descriptive study using interviews, focus groups and documentation will be conducted in parallel and further integrated using a matrix representing sites and findings. An integrated knowledge exchange strategy will ensure uptake by principal stakeholders throughout the research.

**Ethics and Dissemination:** Our study has been approved by all relevant ethics committees. We will follow an integrated knowledge transfer strategy using provincial, national, and international councils. Our research will be the first provincial and cross jurisdictional evaluation of primary care models for patients living with dementia, providing evidence on the ongoing debate on the respective role of clinicians in primary care and specialists in caring for patients with dementia.

**Trial registration:** Not applicable

## KEYWORDS

Primary Health Care; dementia; mixed-methods design

## STRENGTHS AND LIMITATIONS

- Our program is the first to examine multiple models for patients living with dementia in the primary care setting across different jurisdictions and by doing so we will identify key components of dementia care and successful implementation of collaborative care models for dementia.
- We will look at models with different maturity and in different jurisdictions, which will make the comparison of the models challenging; however, we will rely on a descriptive qualitative study to inform stakeholders and given the breadth of the data collection and the triangulation of data, we will be able to obtain a good portrait of the implementation processes.
- By understanding how the collaborative care models were developed, implemented, and evolved over time, our research will provide insight and guidance on successful implementation of collaborative care models for dementia in Canada and internationally to facilitate dissemination and scale-up of dementia best practices.
- Our cross-sectional, observational study design without a control group will allow us to assess association, not causality between quality of care and key components of the collCM but will reflect a more pragmatic, real-world evaluation.
- By using a mixed-methods design, we will understand the link between implementation strategies, characteristics of the models of care, and quality of dementia follow-up while considering multi-level factors, from the patients, to the clinicians, to the primary care organizations levels

## INTRODUCTION

Dementia, such as Alzheimer's disease and other major neurocognitive disorders, is a significant concern(1, 2). The World Health Organization reports that dementia is perhaps the 21st century's most serious health challenge(2). Lack of accessibility to dementia evaluation, treatment and management throughout the course of the disease is a significant problem resulting in long waiting lists, delayed diagnosis, and late intervention(1). In turn, this leads to patient and caregiver uncertainty, inadequate support, and increased burden on caregivers(1). Timely diagnosis at the appropriate level in the healthcare system is increasingly important. In order to provide comprehensive care to patients and their caregivers, collaboration between physicians, nurses, other allied healthcare professionals and various community partners is essential(3).

To deal with this issue in Canada, four Canadian Consensus Conferences on the Diagnosis and Treatment of Dementia (CCCDTD)(4) between 1989 and 2012 have recommended that prevention-promotion, detection, diagnosis, treatment and care of such patients should be primarily the responsibility of the primary healthcare.

However, primary healthcare is not yet fully prepared to deal with patients with dementia(5). It is thus essential to increase the capacity of primary healthcare clinicians to care for this population and to better coordinate care between primary healthcare, memory clinics and community organizations (e.g. the Alzheimer Society, home-based nursing services and home care services).

In response, several Canadian provinces have made considerable efforts to develop and implement Collaborative Care models (collCM) and innovative interventions in primary care to improve accessibility and care for persons with dementia and their caregivers(6-8). These interventions have been implemented in Family Medicine Groups (FMG) in Canada such as dementia strategies and local initiatives(9-11) increasing awareness and training of primary care physicians.

1  
2  
3 These primary care-based collCM share the same visions and objectives. They aim to provide  
4 timely, patient-centered, comprehensive, and continuous inter-professional care for persons with  
5 dementia, including prevention-promotion, detection-diagnosis-treatment, and disease  
6 management-coordination of care throughout the course of the disease using standardized clinical  
7 tools. This could be achieved through collaboration between family physicians, nurses and other  
8 healthcare professionals working in FMG/FHT along with their community partners and  
9 specialists as needed. Primary healthcare is becoming the hub of integrated care, where specialized  
10 services support primary care professionals in managing this complex population. However, the  
11 characteristics of these models, such as the processes and activities performed for persons with  
12 dementia and their caregivers, varies from one FMG/FHT to another. These interventions have  
13 shown promising results in terms of feasibility, clinician participation, and satisfaction(6-8).  
14  
15  
16  
17  
18  
19  
20  
21  
22  
23  
24  
25  
26  
27  
28

29 While many countries have developed dementia strategies(12), very few have been evaluated(13).  
30 To our knowledge, only France(14) and England(15) have an evaluation plan as part of their  
31 strategy, which are focused on speciality care. The implementation of collCM in Canada represent  
32 natural experiments, offering opportunities to evaluate innovative approaches and to identify  
33 determinants of better quality of care for patients with dementia.  
34  
35  
36  
37  
38  
39  
40

41 The overall objective of our research program is to identify key factors for good quality care and  
42 successful collCM implementation, and to facilitate dissemination and scale-up of dementia best  
43 practices. Our program will be the first provincial and cross jurisdictional evaluation of primary  
44 care models for patients living with dementia,  
45  
46  
47  
48  
49

50  
51 The specific objectives are:  
52  
53  
54  
55  
56  
57  
58  
59  
60



- 1  
2  
3 1. To determine the association between potential key factors (organizational characteristics  
4 and clinician characteristics) and outcomes of successful dementia management in primary  
5 care: quality of dementia follow-up, continuity of care, and medications management  
6  
7
- 8  
9  
10 2. To examine how collCM have been developed and implemented and have evolved over  
11 time to improve care of patients with dementia and their caregivers in in Canada  
12  
13
- 14  
15 3. To understand the link between implementation strategies, characteristics of models of care  
16 and quality of dementia follow-up  
17  
18  
19

## 20 21 **METHODS**

22 To reach our objectives, we will use a convergent mixed methods design(16): A quantitative  
23 (observational study using chart review and surveys to answer objective 1) and a qualitative  
24 descriptive study (using interviews, focus groups and documentation to answer objective 2) will  
25 be conducted in parallel and further integrated (objective 3). We have used the SPIRIT  
26 guidelines(18) to present our research protocol (Supplemental file 1).  
27  
28  
29  
30  
31  
32  
33  
34

### 35 **Patient and Public Involvement**

36  
37 Our research program will employ an integrated knowledge exchange strategy(17), with decision-  
38 makers/managers, clinicians, and patients/caregivers representatives throughout the entire study  
39 (Figure 1). We will engage patients, caregivers, clinicians, researchers, managers and decision-  
40 makers, and provincial and Canadian Alzheimer societies heavily throughout the research process.  
41  
42 These stakeholders (clinicians, patients, caregivers, and managers) were involved in defining the  
43 research questions and study design via a series of meetings. They will further be involved in  
44 interpretation of results and dissemination of study results.  
45  
46  
47  
48  
49  
50  
51  
52  
53  
54  
55  
56  
57  
58  
59  
60

## **OBSERVATIONAL STUDY**

### **Main objective**

To determine the association between potential key factors (organizational characteristics and clinician characteristics) and outcomes of successful dementia management in primary care: quality of dementia follow-up, continuity of care and medications management.

### **Site selection**

To identify FMGs/FHTs who have implemented collCM, we will use several strategies: we will draw from the list of sites from the Ministry of Health and we will contact researchers, clinicians, and decision-makers in gerontology, geriatrics and primary care at the provincial and federal levels through our professional contact lists and during national conferences. From this comprehensive list, we will include a total of 28 sites in Ontario, Quebec, and New Brunswick. Sites will be selected based on the type of collCM and level of its implementation. This rich variability across sites will allow us to determine which factors best contribute to the successful management of patients with dementia.

### **Design**

This will be an observational study with a cross-sectional design using a chart review and questionnaires. A chart review will be conducted for patients 75 years old and older with a diagnosis of dementia. One retrospective chart review will be conducted in each site. The study period will be 9 months, from October 1<sup>st</sup>, 2015 to July 1<sup>st</sup>, 2016. The target population is all patients 75 years old and older with a diagnosis of dementia who had at least one visit to the site during the study period.

1  
2  
3 Questionnaires will be sent to the medical directors and clinicians from each site and will collect  
4 information on the organizational characteristics and knowledge, attitudes and practices (19) of  
5  
6 clinicians.  
7  
8

## 9 10 **Chart review**

### 11 *Outcomes*

12  
13  
14 The primary outcome for the observational study is the quality of dementia follow-up. Because no  
15 such measure exists, we developed our own **Quality of Dementia Follow-Up Score** based on the  
16 recommendations from a number of expert groups, such as ACOVE-3(20, 21), CCCDTD(4), and  
17 others sources(9, 22). This score is comprised of 10 indicators of quality of follow-up for dementia  
18 and has been further validated in a pilot study (Table 1)(23). These indicators were selected by our  
19 researchers and experts in dementia based on their concordance with Canadian clinical  
20 recommendations(4) and their feasibility to be measured through a chart review. Patient's  
21 eligibility for each indicator will be assessed over the patient's entire medical chart. Based on the  
22 validated ACOVE approach, a score will be calculated for each patient by summing the number  
23 of indicators performed during the study period by the FMG/FHT divided by the number of eligible  
24 indicators for that patient.  
25  
26  
27  
28  
29  
30  
31  
32  
33  
34  
35  
36  
37  
38  
39  
40  
41  
42  
43  
44  
45  
46  
47  
48  
49  
50  
51  
52  
53  
54  
55  
56  
57  
58  
59  
60

**Table 1** Summary of variables included in the analyses for the observational study with data source

| Type                      | Variable                      | Description                                                                                                                                                                                                                                                                                                                 | Chart review | Organizational questionnaire | Clinicians' questionnaire |
|---------------------------|-------------------------------|-----------------------------------------------------------------------------------------------------------------------------------------------------------------------------------------------------------------------------------------------------------------------------------------------------------------------------|--------------|------------------------------|---------------------------|
| <b>Primary outcome</b>    | Quality of dementia follow-up | 10 ACOVE indicators:<br>Cognitive testing<br>Functional status,<br>Behavioral and psychological symptoms of dementia<br>Weight<br>Caregiver needs<br>Driving status<br>Home care needs<br>Community service needs (e.g., Alzheimer Society)<br>Absence of anticholinergic medication and management of dementia medications | X            |                              |                           |
| <b>Secondary outcomes</b> | Continuity of primary care    | Number of visits to the FMG/FHT; the number of notes, whether or not they were related to dementia, recorded in the charts by the FMG/FHT health professionals; the proportion of patients who have at least two visits to any clinician in the same FMG/FHT during the time period                                         | X            |                              |                           |
|                           | Medications management        | Proportion of patients with dementia who are treated with dementia medication such as cholinesterase inhibitors or Memantine; the proportion of new dementia medications prescribed or initiated; the proportion of new dementia medications                                                                                | X            |                              |                           |

|                              |                                                              |                                                                                                                                                                                                                                                                                                                                                                                                                                                                                                         |   |   |   |
|------------------------------|--------------------------------------------------------------|---------------------------------------------------------------------------------------------------------------------------------------------------------------------------------------------------------------------------------------------------------------------------------------------------------------------------------------------------------------------------------------------------------------------------------------------------------------------------------------------------------|---|---|---|
|                              |                                                              | initiated by family physician; the proportion of new dementia medications initiated by specialists; and the proportion of patients who are treated with anti-psychotics during the period                                                                                                                                                                                                                                                                                                               |   |   |   |
| <b>Explanatory variables</b> | Dementia Care Implementation Score                           | See Appendix A                                                                                                                                                                                                                                                                                                                                                                                                                                                                                          |   | X |   |
|                              | Index of Conformity to an Ideal Type of primary care setting | See Levesque et al. (28)                                                                                                                                                                                                                                                                                                                                                                                                                                                                                |   | X |   |
|                              | Clinician KAP Scores                                         | Clinicians knowledge, attitudes and practices: physicians' and nurses' perceived competency and knowledge related to dementia; the physicians' and nurses' attitudes toward dementia; the physicians' practices in terms of cognitive evaluation; the physicians' attitude toward their collaboration with other FMGs/FHT healthcare professionals; and the nurses' satisfaction with the support from secondary and tertiary care services and the physicians' and nurses' attitudes toward the collCM |   |   | X |
| <b>Confounders</b>           | Patients' characteristics                                    | Age, sex, co-morbidities (Chronic disease score)                                                                                                                                                                                                                                                                                                                                                                                                                                                        | X |   |   |

|  |                                 |                                                                                                                                                                                                              |  |   |  |
|--|---------------------------------|--------------------------------------------------------------------------------------------------------------------------------------------------------------------------------------------------------------|--|---|--|
|  | FMG/FHT demographic information | Rural/urban, number of registered patients, public/private, proximity to memory clinic, university affiliation, socio-economic area based on the FMG/FHT postal code, province, percentage of older patients |  | X |  |
|--|---------------------------------|--------------------------------------------------------------------------------------------------------------------------------------------------------------------------------------------------------------|--|---|--|

We will also examine two secondary outcomes: a) **continuity of primary care** for patients with dementia (including the number of visits to the FMG/FHT; the number of notes, whether or not they were related to dementia, recorded in the charts by the FMG/FHT health professionals; the proportion of patients who have at least two visits to any clinician in the same FMG/FHT during the study period); and b) **medications management** (including proportion of patients with dementia treated with dementia medications such as cholinesterase inhibitors or Memantine; proportion of new dementia medications prescribed or initiated; proportion of new dementia medications initiated by family physician; proportion of new dementia medications initiated by specialists; and proportion of patients treated with anti-psychotics during the study period).

#### *Patient characteristics*

The age, sex, type of dementia, living status and comorbidities of each patient will be collected through the chart review. Comorbidities will be derived from the medication list and scored using the Chronic Disease Score(24).

#### *Data collection procedure*

Patient charts will be randomly selected among a list of registered patients 75 years and older with a dementia diagnosis. Data will be collected by research assistants from patients' charts in a

1  
2  
3 customized and secure, web-based database. An instruction manual for assessing each indicator  
4 that need to be collected through the chart review has already been prepared and tested. To further  
5 ensure the quality of the data collection, all the research assistants who will review patient charts  
6 will be trained by a single supervisor, a research nurse, who will answer any questions that may  
7 arise throughout the chart review process.  
8  
9  
10  
11  
12  
13

### 14 15 **Organizational questionnaire**

16  
17 Our organizational questionnaire has two parts. The first part will assess the various components  
18 of dementia care implemented in each site. We adapted a questionnaire developed to assess the  
19 implementation of chronic care model in the US patient centered medical home, the PCMH-A  
20 questionnaire(25), to the Canadian context using the Canadian recommendations on dementia(26).  
21  
22 An overall score, called the **Dementia Care Implementation Score** ranging from 1 to 10 will be  
23 derived from the questions, where a higher score signifies better implementation of the  
24 recommendations (Supplemental File 2).  
25  
26  
27  
28  
29  
30  
31  
32  
33

34  
35 The second part of the questionnaire will assess site demographic information (Table 1) and  
36 primary care organizational site characteristics. We adapted a validated questionnaire developed  
37 by the Institut national de santé publique du Québec(27) to the Canadian context. From this  
38 questionnaire, we will derive a score called the **Index of Conformity to an Ideal Type of primary  
39 care setting (ICIT)**, where a higher score indicates a better organized primary care setting (e.g.  
40 higher ETP physicians, access to electronic medical records, after-hours care, etc.)(27).  
41  
42  
43  
44  
45  
46  
47  
48

49  
50 Content validity of our organizational questionnaire has been conducted with eight experts and 11  
51 medical directors across the three provinces. Our questionnaire was developed in French and later  
52 translated into English and back translated into French to ensure equivalency between the two  
53  
54  
55  
56  
57  
58  
59  
60

1  
2  
3 versions. Our organizational questionnaire will be mailed in 2017-2018 to the medical directors at  
4 each site, along with two copies of the consent forms and a pre-stamped envelope. Multiple  
5 reminders will be made to increase the completion rate. Data will be entered by a research assistant  
6 and 10% of questionnaires will be checked for reliability of data entry.  
7  
8  
9  
10  
11

### 12 13 **Clinicians' questionnaires** 14

15 Two clinicians' questionnaires, one for the physicians/nurse practitioners and one for the nurses  
16 and other healthcare professionals working in the participating FMG/FHT, will be used to assess  
17 their knowledge, attitudes and practices(19) toward dementia care and toward the collCM  
18 (Supplemental File 3). Both questionnaires have 83 questions, including demographic questions.  
19 From these questionnaires, nine **Clinician KAP Scores** will be calculated: the physicians/NPs'  
20 and nurses' perceived competency and knowledge related to dementia; their attitudes toward  
21 dementia care and their attitudes toward the collCM; the physicians' practices in terms of cognitive  
22 evaluation; the physicians' attitude toward their collaboration with other FMG/FHT healthcare  
23 professionals; and the nurses' satisfaction with the support from secondary and tertiary care  
24 services.  
25  
26  
27  
28  
29  
30  
31  
32  
33  
34  
35  
36  
37  
38

39 The content and construct validity of the questionnaires have been conducted with 12 researchers  
40 and 29 clinicians. Both questionnaires were developed in French and later translated into English  
41 and back translated into French. The questionnaires will be distributed to every family physician,  
42 nurse practitioner and nurse practicing at participating sites in 2017-2018. Multiple reminders will  
43 be made to increase the completion rate. Data will be entered by a research assistant and 10% of  
44 questionnaires will be checked for reliability of data entry.  
45  
46  
47  
48  
49  
50  
51  
52  
53  
54  
55  
56  
57  
58  
59  
60



## Explanatory variables

Explanatory variables in this study will be the scores derived from the organizational and clinician questionnaires; specifically, the Dementia Care Implementation Score, ICIT score and Clinician KAP scores.

## Analysis

### *Descriptive analyses*

A descriptive summary of all study variables (outcomes, explanatory variables, patient and site characteristics) will be conducted overall and by site. For continuous variables, means and standard deviations will be used for normally distributed variables; medians and interquartile ranges will be used for skewed variables. For binary or categorical variables, proportions will be reported.

### *Statistical modelling*

#### *Modelling for primary outcome -Quality of Dementia Follow-Up Score*

To determine the association between the organizational and clinician scores and the quality of dementia follow-up, we will construct a linear mixed effects model using the data collected through the chart review, organizational and clinician questionnaires, and site demographic information. The unit of analysis will be the patient. The site ID will be treated as random effect in the model, which will account for the clustering of patients within FMG/FHT. All other independent variables will be treated as fixed effects. Independent variables will include the explanatory variables (Dementia Care Implementation Score, ICIT score and Clinician KAP scores). The model will also adjust for potential confounding variables including patient characteristics (age, sex, chronic disease score) and FMG/FHT demographic characteristics (rural/urban, number of registered patients, public/private, proximity to memory clinic, university

1  
2  
3 affiliation, socio-economic area based on the FMG/FHT postal code, province, percentage of older  
4 patients). See Table 1 for a summary of the variables.  
5  
6

### 7 8 *Modelling for secondary outcomes* 9

10 Similar models will be constructed to explore the association between the explanatory variables  
11 (Dementia Care Implementation Score, ICIT score and Clinician KAP scores) and the secondary  
12 outcomes (continuity of care and medications management) from the chart review while  
13 controlling for the same site-level and patient-level characteristics.  
14  
15  
16  
17  
18

### 19 20 *Sample Size and Power Determination* 21

22 We based the sample size and power calculation for this study on the primary outcome of quality  
23 of dementia follow-up. As the study was not powered on the secondary outcomes, analyses for  
24 secondary outcomes will be considered exploratory in nature. Statistically significant findings for  
25 secondary outcomes will be interpreted as hypothesis generating.  
26  
27  
28  
29  
30  
31

32 To maximize our effective sample size, we strove to maximize the number of FMG/FHT that could  
33 be included in the study based on time and budget constraints while also ensuring that an adequate  
34 effect size for the statistical models could be detected. With these constraints in mind, we  
35 determined that we would be able to include 28 sites in the study. Using an estimated Intraclass  
36 Correlation Coefficient (ICC) of 0.16 based on our pilot data, we established that 30 patients from  
37 each site would allow us to detect a small effect (Cohen's  $f^2 = 0.05$ ) due to a single factor, with  
38 80% power. This effect size corresponds to an  $R^2 = .038$ , meaning that we could detect  
39 explanatory variables that account for at least 3.8% of the variability in the dementia follow-up  
40 scores. Thus, the number of patients required for this study was calculated to be 28 sites x 30 charts  
41 = 840 patients.  
42  
43  
44  
45  
46  
47  
48  
49  
50  
51  
52  
53  
54  
55  
56  
57

## IMPLEMENTATION STUDY

### Main objective

To examine how collCM have been developed, implemented, and evolved over time to improve care of patients with dementia and their caregivers in Canada.

### Design

We will use a qualitative descriptive design(28). A qualitative descriptive design is appropriate when the aim is to provide an in-depth description of a phenomenon, and when the phenomenon is of particular relevance to clinicians and policy-makers(28).

### Sites selection

From the 28 sites selected in the observational study, 22 sites will be sampled according to a purposeful maximum variation sampling method based on the type of collCM and rural/urban location.

### Data sources and target populations

Two sources of data will be used on different target populations.

#### *Organizational questionnaire*

The data collected from the organizational questionnaire will provide descriptive information about each primary care site including the patient population, human resources, and funding model, thus providing important contextual information (see observational study above).

#### *Interviews*

In-depth semi-structured interviews(29) will provide the primary source of data for the implementation study.

1  
2  
3 Interviews will be conducted in 2017 and 2019 with three clinicians (one family physician, one  
4 nurse, and one other health professional) involved in delivering care and with one leader who  
5 implemented the collCM within each site. In addition, interviews will be conducted in both 2017  
6 and 2019 with at least one representative from each provincial Ministry of Health including project  
7 managers. In 2018, interviews with two patients from each FHT/FMG will be conducted.  
8 Physicians will identify patients who are capable to participate in an interview, and for whom  
9 participation in an interview would not be detrimental to the patient. If the patient prefers,  
10 interviews can be conducted together with their family/friend caregiver. Patients and caregivers  
11 will be asked about their experiences with the collCM in their FHT/FMG (i.e., what have they  
12 enjoyed/found helpful about their experience, what they have not enjoyed/not found helpful, and  
13 how their experience could be improved). We will interview a convenient sample of physicians,  
14 nurses and other professionals involved in the day-to-day work. Interviewing this broad range of  
15 individuals will enable all aspects of the models to be examined and ensure that all components of  
16 the specific objectives will be addressed.  
17  
18  
19  
20  
21  
22  
23  
24  
25  
26  
27  
28  
29  
30  
31  
32  
33  
34  
35

36 Overall, there will be a total of 201 interviews conducted. Interview guides have been developed  
37 based on previous work conducted by our team (not yet published). The interviews will be  
38 conducted mainly by phone for the clinicians, managers and government representatives, and in  
39 person (e.g., at home) for patients. All the interview guides will be pilot tested for refinement and  
40 validation.  
41  
42  
43  
44  
45  
46  
47

## 48 **Analysis**

49 Interviews will be transcribed and entered into NVivo12. Responses to open-ended questions from  
50 the organizational questionnaire will also be entered into NVivo12 to allow for analysis of all of  
51 the qualitative data. Data will be analyzed using conventional content analysis(30, 31). Interview  
52  
53  
54  
55  
56  
57

1  
2  
3 transcripts will be independently coded by two team researchers, who will compare codes to agree  
4  
5 on a codebook for the remaining transcripts. Codes will be collapsed into meaningful themes.  
6  
7

8  
9 Using the theoretical framework of co-creation of innovation in healthcare(3) we will assess:

- 10  
11  
12 1) The theoretical basis for the model (objectives, vision, mechanisms of action, target  
13  
14 population, etc.) and its components presently implemented (actions; material,  
15  
16 financial and human resources; organizational structure; clinical interventions;  
17  
18 timeline; frequency of the actions);  
19  
20  
21 2) Components of the collCM already in place and those still to be implemented;  
22  
23 factors at the provincial, organizational, clinical team and community levels that  
24  
25 can explain variations in the extent of implementation;  
26  
27  
28  
29 3) *Barriers/Facilitators to Scale-up*: Factors that will be considered in this part of the  
30  
31 analysis will include strategy of change management, resource mobilization,  
32  
33 training, leadership and the role of champions. Data from interviews will be used  
34  
35 in this part of the analysis.  
36  
37  
38

39  
40 Results from this analysis will not only reveal the common processes through which collCM are  
41  
42 co-created but will also explain how models have been tailored to meet the needs of the local  
43  
44 partners and contexts.  
45

#### 46 47 *Strategies to Enhance Rigor*

48  
49 Several strategies will be used to enhance rigor. First, an audit trail of analytical decisions will be  
50  
51 kept using ‘memoing’ in NVivo10. Second, triangulation of data sources and researchers will be  
52  
53 carried out.  
54  
55  
56  
57

## **Integration of the implementation and the observational studies**

To understand the link between implementation strategies, characteristics of models of care and quality of dementia follow-up (objective 3), the data and results from both studies will be integrated, which will provide a rich portrait at the site level(16). We will merge qualitative and quantitative data to compare them. We will develop a full data profile for each site, allowing the joint review of both data types by creating a new dataset(32). First, for the quantitative data, a table of variables for each FMG/FHT will be developed and compared with the overall results across sites. Second, for the qualitative data, summaries of facilitators and barriers for the successful implementation of collCM will be developed for each FMG/FHT. Third, these data will be integrated using a matrix(16), whereby the columns will represent sites and rows will represent findings. This will allow us to draw conclusions on the link between implementation strategies, characteristics of models of care and quality of dementia follow-up.

## **ETHICS AND DISSEMINATION**

This study will be conducted using the principles of integrated knowledge transfer(33). Much of this work will be completed through three active councils: a Provincial Council with partners in the three provinces where we collect data, a Canadian Council with stakeholders across all provinces, and an International Council with researchers from many middle and high income countries (the Netherlands, the United-States of America, Mexico, the United Kingdom, France, Israel, China, Japan and Pan American Health Organization/World Health Organization). We will engage patients, caregivers, clinicians, researchers, managers and decision-makers (deputy ministers), provincial and Canadian Alzheimer societies heavily throughout the research process. For instance, stakeholders (clinicians, patients, caregivers and managers) were involved in defining the research questions and study design via a series of meetings. They will further be

1  
2  
3 involved in interpretation of results and dissemination of study results. We will also use the  
4 following steps. First, we will present clinical sites with their individual results. Second, we will  
5 present results to our councils in order to understand the successful elements that build capacity in  
6 primary care to support the care of persons with dementia, to allow the different provinces to share  
7 successful elements of their Alzheimer plans and strategies, and finally to ensure dissemination  
8 and implementation of best practices across Canada and internationally.  
9

10  
11 Our results will also be disseminated through peer-reviewed journals, conference presentations,  
12 and social, broadcast, and print media. Authorship will be determined based on the International  
13 Committee of Medical Journal Editors recommendations.  
14

15  
16 This multicentre study has received Research Ethics Board (REB) approval from the Centre  
17 Intégré Universitaire de Santé et de Service Social (CIUSSS) du Centre-Ouest-de-l'île-de-Montréal  
18 and from each Centre Intégré de Santé et de Service Social (CISSS) or CIUSSS involved in  
19 Quebec; from the REB at the University of Waterloo; and the REB from Université de Moncton  
20 and both regional health boards in New Brunswick. Amendments to the protocol will be  
21 communicated to all the REB involved and to all regional sites. In addition, each site will give  
22 their approval to participate in the study. The director of each site will grant our team permission  
23 to access patients' charts. All individuals completing the questionnaires and individual face-to-  
24 face interviews will sign a consent form prior to participating (Supplemental File 4). The patients'  
25 capacity to consent will be evaluated by the clinicians and research team. Personal information for  
26 the patient's charts (file number) will be collected but will not be shared to the research team and  
27 will be kept 10 years at the sites. Names of clinicians and medical directors from the sites will be  
28 collected to ensure high completion rate but will be kept separately from the dataset.  
29  
30  
31  
32  
33  
34  
35  
36  
37  
38  
39  
40  
41  
42  
43  
44  
45  
46  
47  
48  
49  
50  
51  
52  
53  
54  
55  
56  
57  
58  
59  
60

## DISCUSSION

Ensuring accessibility to diagnosis, treatment and management throughout the course of dementia is a very significant problem worldwide. In order to provide comprehensive care to patients and their caregivers, enhancing primary care-based dementia care is the way forward.

Our program is the first to examine multiple models for patients living with dementia in the primary care setting across different jurisdictions. It will allow us to identify key factors for good quality of care and successful collCM implementation strategies.

Our study program will provide valuable information for other jurisdictions interested in implementing a collCM. It will provide important and actionable results to provide transformative change both at the local and national levels. The results will be used to support the dissemination and scale up of best dementia primary care practices. This study will produce timely and rigorous measures of quality of care in primary dementia care and its determinants. The results of this study will be used to refine the development of the National Strategy for Alzheimer's Disease and Other Dementias Act in Canada(34). We will work closely with the Canadian Academy of Health Science, who was mandated by the Minister of Health of Canada through the Public Health Agency of Canada, to provide an evidence-informed assessment on the state of knowledge to help develop the national strategy(35).

## DECLARATIONS

### Consent for publication

Not applicable.



### Availability of data and materials

Dataset will be accessible to the investigators of the study and will not be made public. Access to full protocol and statistical code will remain accessible to the investigators of the study only and may be available upon request by contacting the principal investigator (Dr. Isabelle Vedel). Vancouver authorship eligibility guidelines will be used throughout the study.

### Competing interests

The authors declare that they have no competing interests.

### Funding

The pilot study, the development and validation of questionnaires and this study are funded by two operating grants: Pfizer - Fonds de recherche Québec Santé (FRQS) – Ministère de la Santé et des Services Sociaux (2013-2016 #28859) and Canadian Institutes of Health Research CIHR - Canadian Consortium for Neurodegeneration and Aging (CCNA 2014-2019). The funding bodies did not play any role in the design of the study and in writing the manuscript.

### Authors' contributions

IV, CM, YC, SP, GAL, NS, CGS, RS and HB made substantial contributions to the conception or design of the study and drafting the manuscript. All other authors revised the manuscript critically for important intellectual content.

### Acknowledgements

*The Research on Organization of Healthcare Services for Alzheimer's (ROSA) Canadian Team for Healthcare Services/System Improvement in Dementia Care – Phase 1 is composed of the co-principal investigators (Howard Bergman from McGill University, Isabelle Vedel from McGill*

1  
2  
3 *University, Paula Rochon from Women's College Research Institute, Carrie McAiney from*  
4 *University of Waterloo, Yves Couturier from University de Sherbrooke, Sarah Pakzad from*  
5 *Université de Moncton, Susan Bronskill Institute for Clinical Evaluative Sciences, and Erin*  
6 *Strumpf from McGill University).*  
7  
8  
9  
10  
11

12  
13 Collaborating Authors: We want to acknowledge the contribution of all the members of our team,  
14 the *Research on Organization of Healthcare Services for Alzheimer's (ROSA) Canadian Team for*  
15 *Healthcare Services/System Improvement in Dementia Care – Phase 1*, including all investigators  
16 *(Michele Aubin from Université Laval, Roxane Borges da Silva from Université de Montreal,*  
17 *Edeltraut Kroger from Université Laval, Danielle St-Laurent from INSPQ, Valerie Emond from*  
18 *INSPQ, Paul-Emile Bourque from University of Moncton, Geoff Anderson from ICES, Machel*  
19 *Wilchesky from McGill University, Dominique Gagnon from UQAT, Charo Rodriguez from*  
20 *McGill University, Linda Lee, Pamela Baxter, Sharon Kaasalainen from McMaster University,*  
21 *Sherry Dupuis from University of Waterloo, Liette Lapointe from McGill University, Vladimir*  
22 *Khanassov from McGill University, Jennifer Ingram from Trent University, Dallas Seitz from*  
23 *Queen's University), our students (Maude-Émilie Pépin from Université de Sherbrooke, Maxime*  
24 *Guillette from Université de Sherbrooke, Nathalie Dame from Université de Sherbrooke, Frantz*  
25 *Siméon from Laurentian University, and Noémie Nicol-Clavet from Université de Sherbrooke),*  
26 *and the members of our coordinating center, responsible for the data management (Marine*  
27 *Hardouin, Mary Henein, Lucie Vaillancourt Mélanie LeBerre, Rebecca Rupp, Muriel Gueriton*  
28 *from McGill University, Maude-Émilie Pépin from Université de Sherbrooke, Deana Huntsbarger*  
29 *from Kawartha Centre, and Sheri Burns from McMaster University).*  
30  
31  
32  
33  
34  
35  
36  
37  
38  
39  
40  
41  
42  
43  
44  
45  
46  
47  
48  
49  
50  
51  
52  
53  
54  
55  
56  
57  
58  
59  
60

## REFERENCE LIST

1. Alzheimer Society of Canada. Rising tide: the impact of dementia on Canadian society. Toronto, ON 2010.
2. World Health Organization. Dementia: a public health priority 2012 December 1, 2014 Available from: <https://extranet.who.int/agefriendlyworld/wp-content/uploads/2014/06/WHO-Dementia-English.pdf>. Accessed: January 2015]
3. Miller BF. A national agenda for research in collaborative care: papers from the Collaborative Care Research Network Research Development Conference: Agency for Healthcare Research and Quality; 2011.
4. Third Canadian Consensus Conference on diagnosis and treatment of dementia Montreal 2007 [Available from: [http://www.cccdt.ca/pdfs/Final\\_Recommendations\\_CCCDTD\\_2007.pdf](http://www.cccdt.ca/pdfs/Final_Recommendations_CCCDTD_2007.pdf). Accessed: January 2019]
5. Pimlott NJ, Persaud M, Drummond N, Cohen CA, Silviu JL, Seigel K, et al. Family physicians and dementia in Canada Part 1. Clinical practice guidelines: awareness, attitudes, and opinions. *Can Fam Physician*. 2009;55(5):506-7. e5.
6. Vedel I, Monette M, Lapointe L. Portrait des Interventions mises en place au sein des groupes de famille pour les patients avec des troubles cognitifs liés au vieillissement (TCV). Rapport présenté au ministère de la Santé et des Services sociaux du Québec (MSSS). 2012.
7. Lee L, Hillier LM, Stolee P, Heckman G, Gagnon M, McAiney CA, et al. Enhancing Dementia Care: A Primary Care-Based Memory Clinic. *J Am Geriatr Soc*. 2010;58(11):2197-204.
8. Moore A, Patterson C, White J, House ST, Riva JJ, Nair K, et al. Interprofessional and integrated care of the elderly in a family health team. *Can Fam Physician*. 2012;58(8):e436-e41.
9. Ministère de la Santé et des Services Sociaux du Québec. Relever le défi de la maladie d'Alzheimer et des maladies apparentées : une vision centrée sur la personne, l'humanisme et l'excellence. Rapport du comité d'experts en vue de l'élaboration d'un plan d'action pour la maladie d'Alzheimer. Rapport présidé par le Professeur Howard Bergman 2009 [Available from: <http://publications.msss.gouv.qc.ca/msss/document-000869/>. Accessed : January 2010]
10. Government of Ontario, Ministry of Health and Long-Term Care, Ministry of Education (Early Years and Child Care). Developing Ontario's dementia strategy: a discussion paper. 2016.
11. Government of New Brunswick, Council on Aging. We are all in this together: An aging strategy for New Brunswick. 2017.
12. Alzheimer's Disease International publication team. From plan to impact: Progress towards targets of the Global action plan on dementia 2018 Jan 5, 2017. Available from: <https://www.alz.co.uk/adi/pdf/from-plan-to-impact-2018.pdf>.
13. Wortmann M. Importance of national plans for Alzheimer's disease and dementia. *Alzheimers Res Ther*. 2013;5(5):40.
14. Ankri J, Van Broeckhoven C. Evaluation du plan Alzheimer 2008-2012. France; 2013.
15. Public Health England. Improving the dementia diagnosis rate in North East England 2013: An update on prevalence rates; diagnosis rates; crisis related hospital admissions. 2013.
16. Pluye P, Hong QN. Combining the power of stories and the power of numbers: mixed methods research and mixed studies reviews. *Annu Rev Public Health*. 2014;35(1):29-45.
17. Jull J, Giles A, Graham ID. Community-based participatory research and integrated knowledge translation: advancing the co-creation of knowledge. *Implement Sci*. 2017;12(1):150.
18. Chan AW, Tetzlaff JM, Altman DG, Laupacis A, Gøtzsche PC, Kraljević K, et al. SPIRIT 2013 Statement: Defining Standard Protocol Items for Clinical Trials. *Ann Intern Med*. 2013;158(3):200-7.

19. Kaplan SH, Greenfield S, Ware Jr JE. Assessing the effects of physician-patient interactions on the outcomes of chronic disease. *Med Care*. 1989;S110-S27.
20. Wenger NS, Roth CP, Shekelle P, ACOVE Investigators. Introduction to the assessing care of vulnerable elders-3 quality indicator measurement set. *J Am Geriatr Soc*. 2007;55(S2):S247-S52.
21. Wenger NS, Solomon DH, Amin A, Besdine RK, Blazer DG, Cohen H, et al. Application of Assessing Care of Vulnerable Elders-3 Quality Indicators to Patients with Advanced Dementia and Poor Prognosis. *J Am Geriatr Soc*. 2007;55(S2):S457-S63.
22. Callahan CM, Sachs GA, LaMantia MA, Unroe KT, Arling G, Boustani MA. Redesigning systems of care for older adults with Alzheimer's disease. *Health Affairs*. 2014;33(4):626-32.
23. Vedel I, Sourial N, Arsenault-Lapierre G, Godard-Sebillotte C, Bergman H. Impact of the Quebec Alzheimer Plan on the detection and management of Alzheimer disease and other neurocognitive disorders in primary health care: a retrospective study. *CMAJ open*. 2019;7(2):E391-E8.
24. Clark DO, Von Korff M, Saunders K, Baluch WM, Simon GE. A chronic disease score with empirically derived weights. *Med Care*. 1995;33(8):783-95.
25. and TMCfHClaGHRI, Qualis Health. Safety Net Medical Home Initiative. The Patient-Centered Medical Home Assessment Version 4.0. Seattle, WA2014.
26. Gauthier S, Patterson C, Chertkow H, Gordon M, Herrmann N, Rockwood K, et al. Recommendations of the 4th Canadian Consensus Conference on the Diagnosis and Treatment of Dementia. *Can Geriatr J*. 2012;15(4):120-6.
27. Levesque J-F, Pineault R, Provost S, Tousignant P, Couture A, Da Silva RB, et al. Assessing the evolution of primary healthcare organizations and their performance (2005-2010) in two regions of Québec province: Montréal and Montérégie. *BMC Fam Pract*. 2010;11(1):95.
28. Sandelowski M. Whatever Happened to Qualitative Description. *Res Nurs Health*. 2000;23:334-40.
29. Patton MQ. *Qualitative Research and Evaluation Methods* (3rd edition): Sage Publications; 2002.
30. Denzin NK, Lincoln YS. *The Sage handbook of qualitative research*: Sage; 2005.
31. Hsieh H-F, Shannon SE. Three approaches to qualitative content analysis. *Qual Health Res*. 2005;15(9):1277-88.
32. Caracelli VJ, Greene JC. Data analysis strategies for mixed-method evaluation designs. *Educ Eval Policy Anal*. 1993;15(2):195-207.
33. Grimshaw JM, Eccles MP, Lavis JN, Hill SJ, Squires JE. Knowledge translation of research findings. *Implement Sci*. 2012;7:50.
34. Government of Canada, Ministry of Health, National Strategy on Alzheimer's Disease and other Dementias. An Act respecting a national strategy for Alzheimer's disease and other dementias. 2017.
35. Canadian Academy of Health Sciences. Latest Assessments in Progress. CAHS Panel for the Assessment of Evidence and Best Practices for the development of a Canadian Dementia Strategy 2018 [Available from: <http://www.caahs-acss.ca/latest-assessments-in-progress/>?, Accessed January 2019]

1  
2  
3  
4  
5  
6  
7  
8  
9  
10  
11  
12  
13  
14  
15  
16  
17  
18  
19  
20  
21  
22  
23  
24  
25  
26  
27  
28  
29  
30  
31  
32  
33  
34  
35  
36  
37  
38  
39  
40  
41  
42  
43  
44  
45  
46  
47  
48  
49  
50  
51  
52  
53  
54  
55  
56  
57  
58  
59  
60

**Figure Legend**

**Figure 1:** Flowchart representing the research program design.

For peer review only

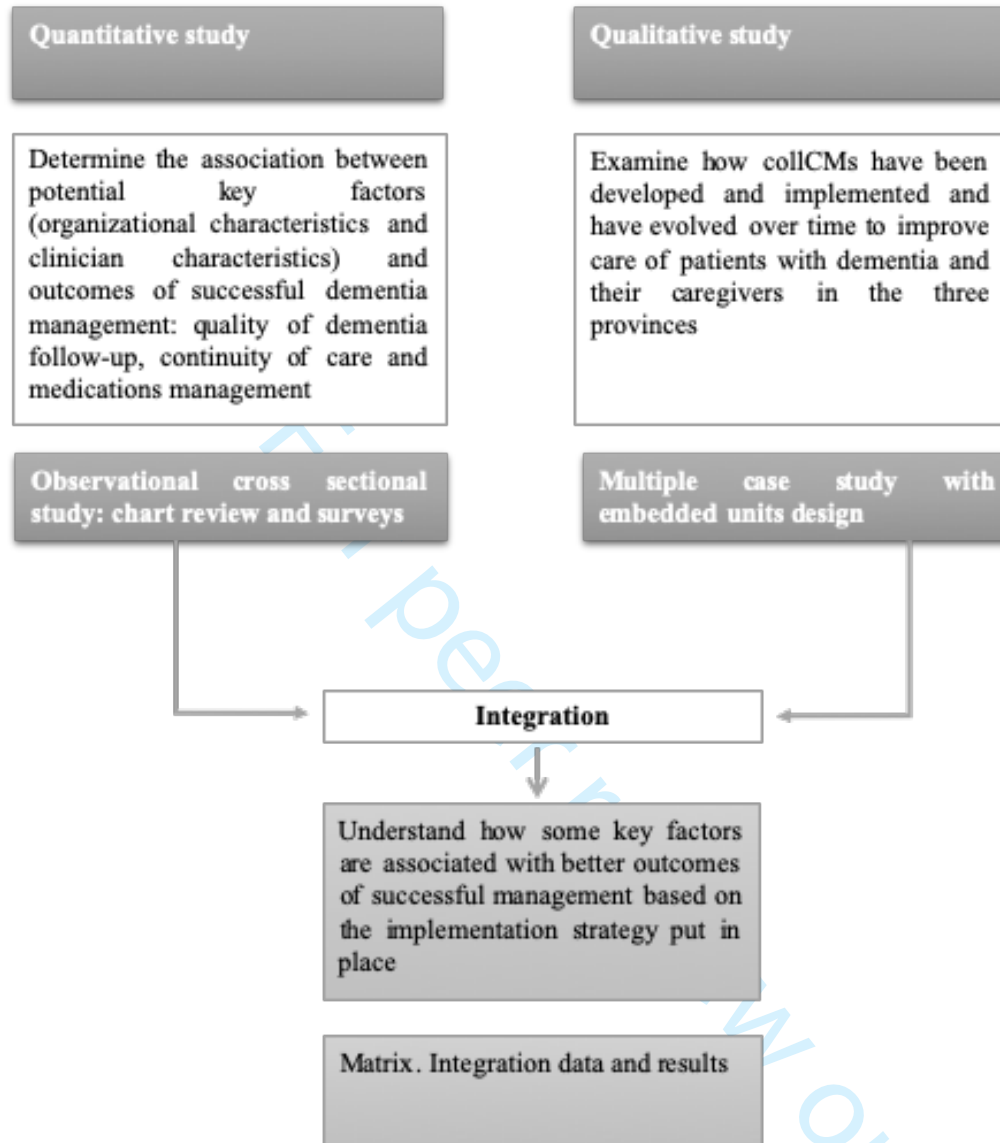

**Figure 1: Research program design**

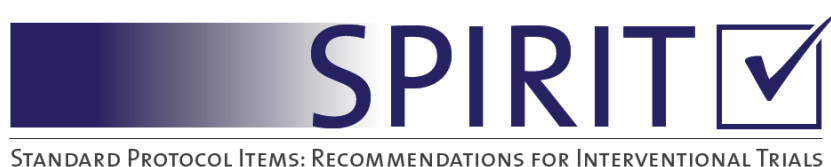

SPIRIT 2013 Checklist: Recommended items to address in a clinical trial protocol and related documents\*

| Section/item                      | Item No | Description                                                                                                                                                                                                                                                                              |
|-----------------------------------|---------|------------------------------------------------------------------------------------------------------------------------------------------------------------------------------------------------------------------------------------------------------------------------------------------|
| <b>Administrative information</b> |         |                                                                                                                                                                                                                                                                                          |
| Title                             | 1       | Descriptive title identifying the study design, population, interventions, and, if applicable, trial acronym                                                                                                                                                                             |
| Trial registration                | 2a      | Trial identifier and registry name. If not yet registered, name of intended registry                                                                                                                                                                                                     |
|                                   | 2b      | All items from the World Health Organization Trial Registration Data Set                                                                                                                                                                                                                 |
| Protocol version                  | 3       | Date and version identifier                                                                                                                                                                                                                                                              |
| Funding                           | 4       | Sources and types of financial, material, and other support                                                                                                                                                                                                                              |
| Roles and responsibilities        | 5a      | Names, affiliations, and roles of protocol contributors                                                                                                                                                                                                                                  |
|                                   | 5b      | Name and contact information for the trial sponsor                                                                                                                                                                                                                                       |
|                                   | 5c      | Role of study sponsor and funders, if any, in study design; collection, management, analysis, and interpretation of data; writing of the report; and the decision to submit the report for publication, including whether they will have ultimate authority over any of these activities |
|                                   | 5d      | Composition, roles, and responsibilities of the coordinating centre, steering committee, endpoint adjudication committee, data management team, and other individuals or groups overseeing the trial, if applicable (see Item 21a for data monitoring committee)                         |
| <b>Introduction</b>               |         |                                                                                                                                                                                                                                                                                          |
| Background and rationale          | 6a      | Description of research question and justification for undertaking the trial, including summary of relevant studies (published and unpublished) examining benefits and harms for each intervention                                                                                       |
|                                   | 6b      | Explanation for choice of comparators                                                                                                                                                                                                                                                    |
| Objectives                        | 7       | Specific objectives or hypotheses                                                                                                                                                                                                                                                        |
| Trial design                      | 8       | Description of trial design including type of trial (eg, parallel group, crossover, factorial, single group), allocation ratio, and framework (eg, superiority, equivalence, noninferiority, exploratory)                                                                                |

## Methods: Participants, interventions, and outcomes

|                      |     |                                                                                                                                                                                                                                                                                                                                                                                |
|----------------------|-----|--------------------------------------------------------------------------------------------------------------------------------------------------------------------------------------------------------------------------------------------------------------------------------------------------------------------------------------------------------------------------------|
| Study setting        | 9   | Description of study settings (eg, community clinic, academic hospital) and list of countries where data will be collected. Reference to where list of study sites can be obtained                                                                                                                                                                                             |
| Eligibility criteria | 10  | Inclusion and exclusion criteria for participants. If applicable, eligibility criteria for study centres and individuals who will perform the interventions (eg, surgeons, psychotherapists)                                                                                                                                                                                   |
| Interventions        | 11a | Interventions for each group with sufficient detail to allow replication, including how and when they will be administered                                                                                                                                                                                                                                                     |
|                      | 11b | Criteria for discontinuing or modifying allocated interventions for a given trial participant (eg, drug dose change in response to harms, participant request, or improving/worsening disease)                                                                                                                                                                                 |
|                      | 11c | Strategies to improve adherence to intervention protocols, and any procedures for monitoring adherence (eg, drug tablet return, laboratory tests)                                                                                                                                                                                                                              |
|                      | 11d | Relevant concomitant care and interventions that are permitted or prohibited during the trial                                                                                                                                                                                                                                                                                  |
| Outcomes             | 12  | Primary, secondary, and other outcomes, including the specific measurement variable (eg, systolic blood pressure), analysis metric (eg, change from baseline, final value, time to event), method of aggregation (eg, median, proportion), and time point for each outcome. Explanation of the clinical relevance of chosen efficacy and harm outcomes is strongly recommended |
| Participant timeline | 13  | Time schedule of enrolment, interventions (including any run-ins and washouts), assessments, and visits for participants. A schematic diagram is highly recommended (see Figure)                                                                                                                                                                                               |
| Sample size          | 14  | Estimated number of participants needed to achieve study objectives and how it was determined, including clinical and statistical assumptions supporting any sample size calculations                                                                                                                                                                                          |
| Recruitment          | 15  | Strategies for achieving adequate participant enrolment to reach target sample size                                                                                                                                                                                                                                                                                            |

## Methods: Assignment of interventions (for controlled trials)

### Allocation:

|                     |     |                                                                                                                                                                                                                                                                                                                                                          |
|---------------------|-----|----------------------------------------------------------------------------------------------------------------------------------------------------------------------------------------------------------------------------------------------------------------------------------------------------------------------------------------------------------|
| Sequence generation | 16a | Method of generating the allocation sequence (eg, computer-generated random numbers), and list of any factors for stratification. To reduce predictability of a random sequence, details of any planned restriction (eg, blocking) should be provided in a separate document that is unavailable to those who enrol participants or assign interventions |
|---------------------|-----|----------------------------------------------------------------------------------------------------------------------------------------------------------------------------------------------------------------------------------------------------------------------------------------------------------------------------------------------------------|



|    |                |     |                                                                         |
|----|----------------|-----|-------------------------------------------------------------------------|
| 1  |                |     |                                                                         |
| 2  | Allocation     | 16b | Mechanism of implementing the allocation sequence (eg, central          |
| 3  | concealment    |     | telephone; sequentially numbered, opaque, sealed envelopes),            |
| 4  | mechanism      |     | describing any steps to conceal the sequence until interventions are    |
| 5  |                |     | assigned                                                                |
| 6  |                |     |                                                                         |
| 7  | Implementation | 16c | Who will generate the allocation sequence, who will enrol participants, |
| 8  |                |     | and who will assign participants to interventions                       |
| 9  |                |     |                                                                         |
| 10 | Blinding       | 17a | Who will be blinded after assignment to interventions (eg, trial        |
| 11 | (masking)      |     | participants, care providers, outcome assessors, data analysts), and    |
| 12 |                |     | how                                                                     |
| 13 |                | 17b | If blinded, circumstances under which unblinding is permissible, and    |
| 14 |                |     | procedure for revealing a participant's allocated intervention during   |
| 15 |                |     | the trial                                                               |
| 16 |                |     |                                                                         |
| 17 |                |     |                                                                         |
| 18 |                |     |                                                                         |
| 19 |                |     |                                                                         |

### Methods: Data collection, management, and analysis

|    |                 |     |                                                                          |
|----|-----------------|-----|--------------------------------------------------------------------------|
| 20 |                 |     |                                                                          |
| 21 | Data collection | 18a | Plans for assessment and collection of outcome, baseline, and other      |
| 22 | methods         |     | trial data, including any related processes to promote data quality (eg, |
| 23 |                 |     | duplicate measurements, training of assessors) and a description of      |
| 24 |                 |     | study instruments (eg, questionnaires, laboratory tests) along with      |
| 25 |                 |     | their reliability and validity, if known. Reference to where data        |
| 26 |                 |     | collection forms can be found, if not in the protocol                    |
| 27 |                 | 18b | Plans to promote participant retention and complete follow-up,           |
| 28 |                 |     | including list of any outcome data to be collected for participants who  |
| 29 |                 |     | discontinue or deviate from intervention protocols                       |
| 30 |                 |     |                                                                          |
| 31 | Data            | 19  | Plans for data entry, coding, security, and storage, including any       |
| 32 | management      |     | related processes to promote data quality (eg, double data entry;        |
| 33 |                 |     | range checks for data values). Reference to where details of data        |
| 34 |                 |     | management procedures can be found, if not in the protocol               |
| 35 |                 |     |                                                                          |
| 36 | Statistical     | 20a | Statistical methods for analysing primary and secondary outcomes.        |
| 37 | methods         |     | Reference to where other details of the statistical analysis plan can be |
| 38 |                 |     | found, if not in the protocol                                            |
| 39 |                 | 20b | Methods for any additional analyses (eg, subgroup and adjusted           |
| 40 |                 |     | analyses)                                                                |
| 41 |                 | 20c | Definition of analysis population relating to protocol non-adherence     |
| 42 |                 |     | (eg, as randomised analysis), and any statistical methods to handle      |
| 43 |                 |     | missing data (eg, multiple imputation)                                   |
| 44 |                 |     |                                                                          |
| 45 |                 |     |                                                                          |
| 46 |                 |     |                                                                          |
| 47 |                 |     |                                                                          |
| 48 |                 |     |                                                                          |
| 49 |                 |     |                                                                          |
| 50 |                 |     |                                                                          |
| 51 |                 |     |                                                                          |

### Methods: Monitoring

|    |                 |     |                                                                      |
|----|-----------------|-----|----------------------------------------------------------------------|
| 52 |                 |     |                                                                      |
| 53 | Data monitoring | 21a | Composition of data monitoring committee (DMC); summary of its role  |
| 54 |                 |     | and reporting structure; statement of whether it is independent from |
| 55 |                 |     | the sponsor and competing interests; and reference to where further  |
| 56 |                 |     | details about its charter can be found, if not in the protocol.      |
| 57 |                 |     | Alternatively, an explanation of why a DMC is not needed             |
| 58 |                 |     |                                                                      |
| 59 |                 |     |                                                                      |
| 60 |                 |     |                                                                      |

|    |          |     |                                                                        |
|----|----------|-----|------------------------------------------------------------------------|
| 1  |          | 21b | Description of any interim analyses and stopping guidelines, including |
| 2  |          |     | who will have access to these interim results and make the final       |
| 3  |          |     | decision to terminate the trial                                        |
| 4  |          |     |                                                                        |
| 5  |          |     |                                                                        |
| 6  | Harms    | 22  | Plans for collecting, assessing, reporting, and managing solicited and |
| 7  |          |     | spontaneously reported adverse events and other unintended effects     |
| 8  |          |     | of trial interventions or trial conduct                                |
| 9  |          |     |                                                                        |
| 10 |          |     |                                                                        |
| 11 | Auditing | 23  | Frequency and procedures for auditing trial conduct, if any, and       |
| 12 |          |     | whether the process will be independent from investigators and the     |
| 13 |          |     | sponsor                                                                |
| 14 |          |     |                                                                        |

### Ethics and dissemination

|    |                   |     |                                                                               |
|----|-------------------|-----|-------------------------------------------------------------------------------|
| 15 |                   |     |                                                                               |
| 16 |                   |     |                                                                               |
| 17 | Research ethics   | 24  | Plans for seeking research ethics committee/institutional review board        |
| 18 | approval          |     | (REC/IRB) approval                                                            |
| 19 |                   |     |                                                                               |
| 20 |                   |     |                                                                               |
| 21 | Protocol          | 25  | Plans for communicating important protocol modifications (eg,                 |
| 22 | amendments        |     | changes to eligibility criteria, outcomes, analyses) to relevant parties      |
| 23 |                   |     | (eg, investigators, REC/IRBs, trial participants, trial registries, journals, |
| 24 |                   |     | regulators)                                                                   |
| 25 |                   |     |                                                                               |
| 26 | Consent or assent | 26a | Who will obtain informed consent or assent from potential trial               |
| 27 |                   |     | participants or authorised surrogates, and how (see Item 32)                  |
| 28 |                   |     |                                                                               |
| 29 |                   | 26b | Additional consent provisions for collection and use of participant data      |
| 30 |                   |     | and biological specimens in ancillary studies, if applicable                  |
| 31 |                   |     |                                                                               |
| 32 |                   |     |                                                                               |
| 33 | Confidentiality   | 27  | How personal information about potential and enrolled participants will       |
| 34 |                   |     | be collected, shared, and maintained in order to protect confidentiality      |
| 35 |                   |     | before, during, and after the trial                                           |
| 36 |                   |     |                                                                               |
| 37 | Declaration of    | 28  | Financial and other competing interests for principal investigators for       |
| 38 | interests         |     | the overall trial and each study site                                         |
| 39 |                   |     |                                                                               |
| 40 |                   |     |                                                                               |
| 41 | Access to data    | 29  | Statement of who will have access to the final trial dataset, and             |
| 42 |                   |     | disclosure of contractual agreements that limit such access for               |
| 43 |                   |     | investigators                                                                 |
| 44 |                   |     |                                                                               |
| 45 | Ancillary and     | 30  | Provisions, if any, for ancillary and post-trial care, and for                |
| 46 | post-trial care   |     | compensation to those who suffer harm from trial participation                |
| 47 |                   |     |                                                                               |
| 48 | Dissemination     | 31a | Plans for investigators and sponsor to communicate trial results to           |
| 49 | policy            |     | participants, healthcare professionals, the public, and other relevant        |
| 50 |                   |     | groups (eg, via publication, reporting in results databases, or other         |
| 51 |                   |     | data sharing arrangements), including any publication restrictions            |
| 52 |                   |     |                                                                               |
| 53 |                   | 31b | Authorship eligibility guidelines and any intended use of professional        |
| 54 |                   |     | writers                                                                       |
| 55 |                   |     |                                                                               |
| 56 |                   |     |                                                                               |
| 57 |                   | 31c | Plans, if any, for granting public access to the full protocol, participant-  |
| 58 |                   |     | level dataset, and statistical code                                           |
| 59 |                   |     |                                                                               |
| 60 |                   |     |                                                                               |

**Appendices**

|                            |    |                                                                                                                                                                                                |
|----------------------------|----|------------------------------------------------------------------------------------------------------------------------------------------------------------------------------------------------|
| Informed consent materials | 32 | Model consent form and other related documentation given to participants and authorised surrogates                                                                                             |
| Biological specimens       | 33 | Plans for collection, laboratory evaluation, and storage of biological specimens for genetic or molecular analysis in the current trial and for future use in ancillary studies, if applicable |

---

\*It is strongly recommended that this checklist be read in conjunction with the SPIRIT 2013 Explanation & Elaboration for important clarification on the items. Amendments to the protocol should be tracked and dated. The SPIRIT checklist is copyrighted by the SPIRIT Group under the Creative Commons "[Attribution-NonCommercial-NoDerivs 3.0 Unported](#)" license.

For peer review only

**Supplemental File 2: Example of questions included in the organizational questionnaire – part A**  
**Dementia Care Practices**

To what extent is there clinical leadership within your FHT regarding the care of patients with dementia?

To what extent is there leadership from external specialized resources in cognition to help your FHT to improve the care provided to patients with dementia?

How much financial support specific to the care of patients with dementia does your FHT receive from health authorities for improving dementia care?

How much financial support specific to the training of clinicians about dementia does your FHT receive from health authorities for the care of patients with dementia?

To what degree does your FHT use clinical guidelines for the care of patients with dementia?

How much regular training in dementia care do physicians practicing in your FHT receive?

How much regular training in dementia care do nurse practitioners practicing in your FHT receive?

How much regular training in dementia care do nurses practicing in your FHT receive?

How much regular training in dementia care do other allied health professionals practicing in your FHT receive?

How easy is it to generate a list of patients with dementia in your FHT?

How often are patient care plans developed by your FHT for patients with dementia?

How often do the patient's regular physicians/nurse practitioners/nurses/other allied professionals within your FHT have formal designated meetings to coordinate care for patients with dementia?

How often do the patient's regular physicians/nurse practitioners/nurses/other allied professionals within your FHT have informal discussions to coordinate care for patients with dementia?

How often does your FHT plan regular follow-up visits for patients with dementia?

How often are patients with dementia linked to a healthcare professional within your FHT who plays the role of case manager, navigator or coordinator?

How often is the burden of the caregivers or family members of patients with dementia within your FHT assessed?

How often are standardized tools used to assess the burden of the caregivers or family members of patients with dementia within your FHT?

1  
2  
3 How often is a formal care plan developed for the caregiver by your FHT?  
4

5 To what extent are the caregivers of patients with dementia within your FHT involved in  
6 developing the care plan for the patient with dementia?  
7

8  
9 To what extent are the caregivers of patients with dementia within your FHT educated for their  
10 role in the patient's care plan?  
11

12 To what extent do the patients in your FHT have access to external resources for caregiver support  
13 in your local community?  
14  
15  
16  
17  
18  
19  
20  
21  
22  
23  
24  
25  
26  
27  
28  
29  
30  
31  
32  
33  
34  
35  
36  
37  
38  
39  
40  
41  
42  
43  
44  
45  
46  
47  
48  
49  
50  
51  
52  
53  
54  
55  
56  
57  
58  
59  
60

**Supplemental File 3: NURSE AND OTHER HEALTH PROFESSIONAL QUESTIONNAIRE**

## A. General questions

In your current clinical practice, do you see patients 65 years old and over?

- Yes  
 No (IF NO, STOP HERE AND GIVE THE QUESTIONNAIRE BACK TO THE PERSON IN CHARGE)

How many years of clinical experience do you have? \_\_\_\_\_

In what settings have you accumulated most of your clinical experience? (check one box only)

- Hospital  
 A community-based practice  
 Residential and long-term care

How many years have you been practising in your current practice setting? \_\_\_\_\_

How many of your patients are 65 years of age or older (check one box only)?

- 0-25%  
 26-50%  
 51-75%  
 76-100%  
 DK (don't know)

How many of your patients have dementia (check one box only)? \_\_\_\_\_

- 0-25%  
 26-50%  
 51-75%  
 76-100%  
 DK (don't know)

Do you have access in your community to specialized medical services for the elderly, such as memory clinics, geriatricians, etc.?

- Yes  
 No  
 DK

Were you recruited as part of a provincial initiative on aging or dementia?

- Yes  
 No

Are you responsible for coordinating services for the elderly in your clinic?

- Yes  
 No

1  
2  
3 What languages do you use most often in your practice setting? (check all that apply)  
4

- 5  French  
6  English  
7  Other (specify : \_\_\_\_\_)  
8

9 Your practice setting is mainly:  
10

- 11  Rural  
12  Urban  
13

14 You are a:  
15

- 16  Man  
17  Woman  
18

19 Your professional background is: (check one box only)  
20

- 21  Nurse  
22  Social worker  
23  Other (specify): \_\_\_\_\_  
24

25 What is your level of education? (check one box only)  
26

- 27  College diploma  
28  Bachelors degree  
29  Masters degree  
30  Masters degree plus a post-graduate degree (advanced practice nurse, nurse practitioner or RN-EC)  
31  Other (please specify): \_\_\_\_\_  
32  
33  
34  
35  
36  
37  
38  
39  
40  
41  
42  
43  
44  
45  
46  
47  
48  
49  
50  
51  
52  
53  
54  
55  
56  
57  
58  
59  
60

## B. Attitude, knowledge, and practice

**You typically perform cognitive tests** (check only one box):

- Independently or autonomously  
 In close collaboration/consultation with a physician  
 Only when a physician requests it (IF SO, SKIP TO QUESTION 2)

**Please indicate the extent to which you agree or disagree with each of the following statements concerning your ambulatory patients aged 65 years or older by circling the appropriate number:**

|                                                                                                                   | Disagree | Somewhat disagree | Somewhat agree | Agree | Don't know | Not applicable |
|-------------------------------------------------------------------------------------------------------------------|----------|-------------------|----------------|-------|------------|----------------|
| <b>I believe that I have the skills to...</b>                                                                     |          |                   |                |       |            |                |
| ... identify cognitive impairment.                                                                                | 1        | 2                 | 3              | 4     | DK         | N/A            |
| ... develop an appropriate care plan for patients with dementia.                                                  | 1        | 2                 | 3              | 4     | DK         | N/A            |
| ... give information about dementia to patients and their families.                                               | 1        | 2                 | 3              | 4     | DK         | N/A            |
| ... follow up appropriately with patients with cognitive impairment.                                              | 1        | 2                 | 3              | 4     | DK         | N/A            |
| ... involve the informal caregiver in the <i>assessment</i> .                                                     | 1        | 2                 | 3              | 4     | DK         | N/A            |
| ... involve the informal caregiver in <i>implementing care plans</i> .                                            | 1        | 2                 | 3              | 4     | DK         | N/A            |
| <b>In my clinical environment, I have access to...</b>                                                            |          |                   |                |       |            |                |
| ... home-based care services (regional health and social services center) for patients with dementia.             | 1        | 2                 | 3              | 4     | DK         | N/A            |
| ... resources in the community (such as Alzheimer Society meals on wheels, disability transportation, etc....).   | 1        | 2                 | 3              | 4     | DK         | N/A            |
| <b>In my day-to-day work...</b>                                                                                   |          |                   |                |       |            |                |
| I think that several things can be done to improve the quality of life of a <i>patient living with dementia</i> . | 1        | 2                 | 3              | 4     | DK         | N/A            |



|                                                                                                             | Disagree | Somewhat disagree | Somewhat agree | Agree | Don't know | Not applicable |
|-------------------------------------------------------------------------------------------------------------|----------|-------------------|----------------|-------|------------|----------------|
| I think that several things that can be done to improve the quality of life of <i>informal caregivers</i> . | 1        | 2                 | 3              | 4     | DK         | N/A            |
| I feel comfortable caring for patients with dementia.                                                       | 1        | 2                 | 3              | 4     | DK         | N/A            |
| I think that the families of patients with dementia prefer being involved in the patient's care management. | 1        | 2                 | 3              | 4     | DK         | N/A            |
| I think that the family and friends of patients have a key role to play in the management of dementia.      | 1        | 2                 | 3              | 4     | DK         | N/A            |
| I regularly keep up-to-date with dementia care guidelines.                                                  | 1        | 2                 | 3              | 4     | DK         | N/A            |

**Please answer the following questions referring to your opinion on the Alzheimer Plan proposed by the Ministry of Health. (Circle one answer)**

**I understand the vision and values of Alzheimer Plan.**

check here if not applicable

|                       |   |   |   |                     |   |   |   |   |                      |
|-----------------------|---|---|---|---------------------|---|---|---|---|----------------------|
| Understand not at all |   |   |   | Somewhat understand |   |   |   |   | Understand very well |
| 1                     | 2 | 3 | 4 | 5                   | 6 | 7 | 8 | 9 | 10                   |

**I think that the changes proposed by the Alzheimer Plan will benefit me: they will help me do my work better.**

check here if not applicable

|                       |   |   |   |                     |   |   |   |   |                 |
|-----------------------|---|---|---|---------------------|---|---|---|---|-----------------|
| Not at all beneficial |   |   |   | Somewhat beneficial |   |   |   |   | Very beneficial |
| 1                     | 2 | 3 | 4 | 5                   | 6 | 7 | 8 | 9 | 10              |

**I have received sufficient coaching/training around Alzheimer Plan.**

check here if not applicable

|                       |   |   |   |                     |   |   |   |   |                 |
|-----------------------|---|---|---|---------------------|---|---|---|---|-----------------|
| Not at all sufficient |   |   |   | Somewhat sufficient |   |   |   |   | Very sufficient |
| 1                     | 2 | 3 | 4 | 5                   | 6 | 7 | 8 | 9 | 10              |

1  
2  
3  
4  
5  
6  
7  
8  
9  
10  
11  
12  
13  
14  
15  
16  
17  
18  
19  
20  
21  
22  
23  
24  
25  
26  
27  
28  
29  
30  
31  
32  
33  
34  
35  
36  
37  
38  
39  
40  
41  
42  
43  
44  
45  
46  
47  
48  
49  
50  
51  
52  
53  
54  
55  
56  
57  
58  
59  
60

**I feel that the changes proposed by the Alzheimer Plan give me the liberty needed to adapt my practice to patients with dementia.**

check here if not applicable

| No<br>liberty at<br>all |   |   |   |   | Some<br>liberty |   |   |   |    | Very large<br>liberty |
|-------------------------|---|---|---|---|-----------------|---|---|---|----|-----------------------|
| 1                       | 2 | 3 | 4 | 5 | 6               | 7 | 8 | 9 | 10 |                       |

---

***Thank you!***

***Please return the questionnaire to «responsible\_distribution».***

**Supplemental File 4: Patients' consent form for Quebec****Consent form  
Patients and family caregivers' interview****Version 4, May 23<sup>rd</sup>, 2017**

**Title:** Assessing care models implemented in primary health care for persons with Alzheimer's disease and related disorders

**Investigator**

This study is headed by Dr. Isabelle Vedel, from Montreal Jewish General Hospital's Lady Davis Institute. This interview is supervised by Dr. Yves Couturier (Ph.D.), Professor, Health and Social Services Centre — University Institute of Geriatrics of Sherbrooke.

Before you agree to take part in this study, it is important that you read and understand the information in this consent form. Ask as many questions as you need to understand what is expected of you. You have no obligation to participate if you do not want to participate.

**Purpose of the study**

The Ministry of Health has recently implemented an intervention in the Quebec Family Medicine Groups (FMG). The purpose of this intervention is to improve the quality of care given to patients with cognitive impairments. In this study, we want to see how this intervention was implemented in the FMG and what its effects are on the quality of the care you receive.

This study was sponsored by the Canadian Institutes for Health Research (CIHR).

**What is expected of you**

If you agree to participate, we will ask you to do an interview, which will last a maximum of 60 minutes. We will ask you about your experience at the FMG and on the care you receive. Specifically, we will ask you about what you enjoy, what you find helpful about your experience, what you do not enjoy, what you do not find helpful, and how your experience could be improved.

**Possible risks associated with participation**

During the interview, we will ask you about the care you receive, your diagnosis, how it was given to you and your experience in general. Some questions may remind you of painful memories or stressful moments and trigger negative reactions.

**Benefits associated with participation and compensation**

Participating in this project gives you a chance to talk to a neutral outsider about your experience. It gives you a chance to think back on the good and not-so-good aspects of the care you are given and to take stock.

You will also receive a 20\$ gift-card to compensate for the time you have given this project.

**Voluntary participation and right to withdraw**

You have no obligation to participate. If you refuse, it will not have any consequences on your care and your refusal to participate will be kept confidential. Even if you agree to participate, you can decide not to do so at any time, without consequences or judgment. You do not even have to tell us your reasons. You can also choose not to answer some of the questions during the interview.

## Confidentiality and data management

To make sure that your identity will not be discovered by anyone outside our team, we have taken those steps:

- We will give you a personal identification number (PIN) as soon as you will be enrolled. It will be composed of random numbers. That way, your real name will never appear in our reports;
- We will use your PIN for all of our documents. The researcher is the only one who will have access to the list that links your name and your PIN;
- A member of our team will transcribe your interview;
- We will always present results on groups, never on specific individuals;
- The material we will use for the project (recordings, retranscriptions, researcher's notes...) will be kept on the research network of Sherbrooke University's Research Center on Aging, where Dr Couturier works. To get access to the data, we need a computer linked to the server. Every linked computer is protected by a password;
- Our team might participate in another project on the same subject. If so, your data may be re-used, but only the PIN protected data will be used, protecting your identity;
- All paper documents with your name (consent forms, ...) will be kept in a locked file cabinet, inside a locked suite, in McGill University's Department of Family Medicine. Only the principal investigators and their assistants will have access to these documents;
- Other paper data will be kept at all time in a locked drawer in room 2444 (which is also locked) in the Research Center on Aging. Only Yves Couturier (researcher in charge of the interviews) and his assistants will have access to it.
- We will present the results of our project in scientific journals and in different conferences, but it will not be possible to identify you specifically or to recognize you. The results will be presented in a general manner, with no link to your FMG or to your identity. We might, however, use a couple of quotes from your interviews. If so, we will use an alias;
- We will send a short summary of our results to interested participants. If you want to receive one, write down your postal or email address in the Signatures section;
- All data will be safely and permanently destroyed by November 2029, at the latest: the paper data will be shredded and we will ask the IT services to permanently delete the data on our computers and our servers. All your personal data will be destroyed;

For surveillance and monitoring purposes, your research file might be consulted by someone mandated by the West-Central Montreal Health's Research Ethics Committee, the establishment, or by someone mandated by authorized public bodies. Each of those persons and bodies are trained to make sure your identity is kept confidential.

For safety purposes, notably to enable us to communicate with you quickly, your name and surname, your contact information and the dates of the beginning and the end of your participation to the study will be kept for a year after the end of the study in a separate repertory maintained by the investigator in charge of the study.

## Additional information

If you have any questions about the study or your participation, please contact the principal investigator, Dr. Isabelle Vedel, at: 514-399-9107, or the email address: [isabelle.vedel@mcgill.ca](mailto:isabelle.vedel@mcgill.ca).

1  
2  
3 You can also contact Yves Couturier, who is in charge of the interviews, at: (819) 780-2220 ext.  
4 45143, or email address: [yves.couturier@usherbrooke.ca](mailto:yves.couturier@usherbrooke.ca)  
5

6 If you have any complaints or critics about the study, you can contact the Service Quality and  
7 Complaints Commissioner of the Montréal West Island IUHSSC at [rsteinberg@jgh.mcgill.ca](mailto:rsteinberg@jgh.mcgill.ca).  
8

9 If you feel like you need more information and resources on dementia, you can ask your pivot  
10 nurse and/or contact the Alzheimer Society at: 514-369-7891, 1-888-636-6473 (41), or by email:  
11 [info@alzheimerquebec.ca](mailto:info@alzheimerquebec.ca). You can also visit their website:  
12 <http://www.alzheimer.ca/en/federationquebecoise>.  
13

14 If you feel isolated or if you want to talk about your situation, you can call the helpline Tel-Aînés  
15 at: 514-353-2463.

16 If you are in a situation of abuse, neglect or mistreatment, you can call your clinic's ombudsman  
17 and/or call the helpline Ligne Aide Abus Aînés (1-888-489-2287).  
18

### 19 **Acknowledgments**

20 Your collaboration is precious and will enable us to successfully conduct this study. Thank you  
21 for taking the time to participate despite your heavy schedule.  
22  
23  
24  
25  
26  
27  
28  
29  
30  
31  
32  
33  
34  
35  
36  
37  
38  
39  
40  
41  
42  
43  
44  
45  
46  
47  
48  
49  
50  
51  
52  
53  
54  
55  
56  
57  
58  
59  
60

*Assessing care models implemented in primary health care for persons with Alzheimer's disease and related disorders*

## Signatures

I, \_\_\_\_\_, freely consent to participate in the study named:  
« Assessing care models implemented in primary health care for persons with Alzheimer's disease and related disorders».

I have read the above information and I have understood the purpose, nature, benefits, risks and discomforts associated with this study. I am satisfied with the explanations and answers the investigator has given me, if needed, regarding my participation in this project.

\_\_\_\_\_  
Participant's signature

\_\_\_\_\_  
Date

A small summary of the results will be sent to the participants who will have written the address where they wish the document to be delivered. **The results won't be available until May 2019. If the address were to change before this date, feel free to give the new address to the investigator.**

\_\_\_\_\_  
Address (postal or electronic) where you want the summary to be sent.

I have explained to the participant the nature, benefits, risks and discomforts associated with the project. I have answered to the best of my knowledge the questions asked by the participant and I have made sure that he/she understood.

\_\_\_\_\_  
Investigator's signature

\_\_\_\_\_  
Date

**Other consent forms are available upon request by contacting the principal investigator (Dr. Isabelle Vedel) directly**

# BMJ Open

## Assessing care models implemented in primary health care for persons with dementia : a mixed methods study protocol

|                                 |                                                                                                                                                                                                                                                                                                                                                                                                                                                                                                                                             |
|---------------------------------|---------------------------------------------------------------------------------------------------------------------------------------------------------------------------------------------------------------------------------------------------------------------------------------------------------------------------------------------------------------------------------------------------------------------------------------------------------------------------------------------------------------------------------------------|
| Journal:                        | <i>BMJ Open</i>                                                                                                                                                                                                                                                                                                                                                                                                                                                                                                                             |
| Manuscript ID                   | bmjopen-2019-035916.R1                                                                                                                                                                                                                                                                                                                                                                                                                                                                                                                      |
| Article Type:                   | Protocol                                                                                                                                                                                                                                                                                                                                                                                                                                                                                                                                    |
| Date Submitted by the Author:   | 02-Apr-2020                                                                                                                                                                                                                                                                                                                                                                                                                                                                                                                                 |
| Complete List of Authors:       | Vedel, Isabelle; McGill University, Family Medicine<br>McAiney, Carrie; University of Waterloo,<br>Couturier, Yves; Universite de Sherbrooke, social work<br>Pakzad, Sarah; University of Moncton, School of Psychology<br>Arsenault-Lapierre, Genevieve; Lady Davis Institute for Medical Research<br>Godard-Sebillotte, Claire; McGill University,<br>Sourial, Nadia; McGill University, Family Medicine; McGill University<br>Simmons, Rachel; McGill University, Family Medicine<br>Bergman, Howard; McGill University, Family Medicine |
| <b>Primary Subject Heading</b>: | Health services research                                                                                                                                                                                                                                                                                                                                                                                                                                                                                                                    |
| Secondary Subject Heading:      | General practice / Family practice, Geriatric medicine, Public health, Patient-centred medicine                                                                                                                                                                                                                                                                                                                                                                                                                                             |
| Keywords:                       | PRIMARY CARE, Dementia < NEUROLOGY, Health policy < HEALTH SERVICES ADMINISTRATION & MANAGEMENT                                                                                                                                                                                                                                                                                                                                                                                                                                             |
|                                 |                                                                                                                                                                                                                                                                                                                                                                                                                                                                                                                                             |

SCHOLARONE™  
Manuscripts

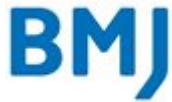

I, the Submitting Author has the right to grant and does grant on behalf of all authors of the Work (as defined in the below author licence), an exclusive licence and/or a non-exclusive licence for contributions from authors who are: i) UK Crown employees; ii) where BMJ has agreed a CC-BY licence shall apply, and/or iii) in accordance with the terms applicable for US Federal Government officers or employees acting as part of their official duties; on a worldwide, perpetual, irrevocable, royalty-free basis to BMJ Publishing Group Ltd ("BMJ") its licensees and where the relevant Journal is co-owned by BMJ to the co-owners of the Journal, to publish the Work in this journal and any other BMJ products and to exploit all rights, as set out in our [licence](#).

The Submitting Author accepts and understands that any supply made under these terms is made by BMJ to the Submitting Author unless you are acting as an employee on behalf of your employer or a postgraduate student of an affiliated institution which is paying any applicable article publishing charge ("APC") for Open Access articles. Where the Submitting Author wishes to make the Work available on an Open Access basis (and intends to pay the relevant APC), the terms of reuse of such Open Access shall be governed by a Creative Commons licence – details of these licences and which [Creative Commons](#) licence will apply to this Work are set out in our licence referred to above.

Other than as permitted in any relevant BMJ Author's Self Archiving Policies, I confirm this Work has not been accepted for publication elsewhere, is not being considered for publication elsewhere and does not duplicate material already published. I confirm all authors consent to publication of this Work and authorise the granting of this licence.



1  
2  
3  
4  
5 **1 ASSESSING CARE MODELS IMPLEMENTED IN PRIMARY HEALTH CARE FOR**  
6 **2 PERSONS WITH DEMENTIA: A MIXED METHODS STUDY PROTOCOL**

7  
8 3 Authors:

9  
10 4 Isabelle Vedel\*, MD, PhD, McGill University, Department of Family Medicine,  
11 [isabelle.vedel@mcgill.ca](mailto:isabelle.vedel@mcgill.ca)  
12

13 6 \*Corresponding Author

14  
15 7 Carrie McAiney, MA, PhD, University of Waterloo, School of Public Health and Health Systems  
16 and Schlegel-UW Research Institute for Aging [carrie.mcainey@uwaterloo.ca](mailto:carrie.mcainey@uwaterloo.ca)  
17

18  
19 9 Yves Couturier, PhD, University of Sherbrooke, Département de travail social,  
20 [yves.couturier@usherbrooke.ca](mailto:yves.couturier@usherbrooke.ca)  
21

22  
23 11 Sarah Pakzad, PhD, Moncton University, School of Psychology, [sarah.pakzad@umoncton.ca](mailto:sarah.pakzad@umoncton.ca)

24  
25 12 Geneviève Arsenault-Lapierre, PhD, Lady Davis Institute, Jewish General Hospital,  
26 [genevieve.arsenault-lapierre@mail.mcgill.ca](mailto:genevieve.arsenault-lapierre@mail.mcgill.ca)  
27

28  
29 14 Claire Godard-Sebillotte, MD, McGill University, Department of Family Medicine, [claire.godard-sebillotte@mail.mcgill.ca](mailto:claire.godard-sebillotte@mail.mcgill.ca)  
30

31  
32 16 Nadia Sourial, MSc, McGill University, Department of Family Medicine,  
33 [nadia.sourial@mail.mcgill.ca](mailto:nadia.sourial@mail.mcgill.ca)  
34

35  
36 18 Rachel Simmons, MSc, McGill University, Department of Family Medicine,  
37 [rachel.simmons@mcgill.ca](mailto:rachel.simmons@mcgill.ca)

38  
39 20 Howard Bergman, MD, McGill University, Department of Family Medicine,  
40 [howard.bergman@mcgill.ca](mailto:howard.bergman@mcgill.ca)  
41

42 22 Research on the Organization of Healthcare Services for Alzheimers Team\*\*

43  
44 23 [equiperosateam-admin.fammed@mcgill.ca](mailto:equiperosateam-admin.fammed@mcgill.ca)  
45

46 24 \*\*individual authors listed in Acknowledgements under collaborating authors.  
47  
48

49 25  
50  
51 26 **Word Count : 3852**  
52  
53 27  
54  
55 28  
56  
57

## 29 **ABSTRACT**

30 **Introduction:** Dementia is on the rise in Canada and globally. Ensuring accessibility to diagnosis,  
31 treatment and management throughout the course of the disease is a very significant problem  
32 worldwide. In order to provide comprehensive care to patients and their caregivers, enhancing  
33 primary care-based dementia care is seen as the way forward. In many Canadian provinces various  
34 collaborative care models anchored in primary care to improve dementia care have been developed  
35 and implemented. The overall objective of our research program is to identify key factors for the  
36 successful implementation of collaborative care models, and to facilitate dissemination and scale  
37 up of dementia best practices.

38 **Methods and Analysis:** We will use a convergent mixed methods design. An observational study  
39 using chart review (2014-2016) and questionnaires (2014-2018; repeated in 2020) will measure  
40 application of guidelines and implementation of collaborative care models. This study will be  
41 complemented with a qualitative descriptive study using interviews (2017-2020) conducted in  
42 parallel. Quantitative and qualitative results will be further integrated using a matrix representing  
43 sites and findings. An integrated knowledge exchange strategy will ensure uptake by principal  
44 stakeholders throughout the research.

45 **Ethics and Dissemination:** Our study has been approved by all relevant ethics committees. Our  
46 dissemination plan follows an integrated knowledge transfer strategy using provincial, national,  
47 and international councils. We will present the results individually to the clinical sites and then to  
48 these councils. Our research will be the first provincial and cross jurisdictional evaluation of  
49 primary care models for patients living with dementia, providing evidence on the ongoing debate  
50 on the respective role of clinicians in primary care and specialists in caring for patients with  
51 dementia.

1  
2  
3 52 **Trial registration:** Not applicable  
4  
5

6  
7 53 **KEYWORDS**

8  
9 54 Primary Health Care; dementia; mixed-methods design; health policy  
10  
11

12  
13 55 **STRENGTHS AND LIMITATIONS**

- 14 56 - Our program is the first to examine multiple models for patients living with dementia in  
15  
16 57 the primary care setting across different jurisdictions and by doing so we will identify key  
17  
18 58 components of dementia care and successful implementation of collaborative care models  
19  
20  
21 59 (collCM) for dementia.  
22  
23  
24 60 - We will look at collCM with different maturity and in different jurisdictions, which will  
25  
26 61 make the comparison of the models challenging; however, we will rely on a descriptive  
27  
28 62 qualitative study to inform stakeholders and given the breadth of the data collection and  
29  
30 63 the triangulation of data, we will be able to obtain a good portrait of the implementation  
31  
32 64 processes.  
33  
34  
35 65 - By understanding how the collCM were developed, implemented, and evolved over time,  
36  
37 66 our research will provide insight and guidance on successful implementation of  
38  
39 67 collaborative care models for dementia in Canada and internationally to facilitate  
40  
41 68 dissemination and scale-up of dementia best practices.  
42  
43  
44 69 - Our cross-sectional, observational study design without a control group will allow us to  
45  
46 70 assess association, not causality between quality of care and key components of the collCM  
47  
48 71 but will reflect a more pragmatic, real-world evaluation.  
49  
50  
51  
52  
53  
54  
55  
56  
57  
58  
59  
60

- 1  
2  
3 72 - By using a mixed-methods design, we will understand the link between implementation  
4  
5 73 strategies, characteristics of the models of care, and quality of dementia care while  
6  
7 74 considering multi-level factors, from the patients, to the clinicians, to the primary care  
8  
9 75 organizations levels  
10  
11  
12  
13

## 14 76 **INTRODUCTION**

15 77 The World Health Organization reports that dementia, such as Alzheimer's disease and other major  
16  
17 78 neurocognitive disorders(1, 2), is perhaps the 21st century's most serious health challenge(2). Lack  
18  
19 79 of accessibility to dementia evaluation, treatment and management throughout the course of the  
20  
21 80 disease is a significant problem resulting in long waiting lists, delayed diagnosis, and late  
22  
23 81 intervention(1). In turn, this leads to patient and caregiver uncertainty, inadequate support, and  
24  
25 82 increased burden on caregivers(1). Timely diagnosis at the appropriate level in the healthcare  
26  
27 83 system is increasingly important. In order to provide comprehensive care to patients and their  
28  
29 84 caregivers, collaboration between physicians, nurses, other allied healthcare professionals and  
30  
31 85 various community partners is essential(3).  
32  
33  
34  
35  
36

37 86 To deal with this issue in Canada, four Canadian Consensus Conferences on the Diagnosis and  
38  
39 87 Treatment of Dementia (CCCDTD)(4) between 1989 and 2012 have made a series of  
40  
41 88 recommendations and guidelines that promote detection, diagnosis, treatment, management and  
42  
43 89 coordination of care of patients living with dementia should be primarily the responsibility of the  
44  
45 90 primary healthcare.  
46  
47  
48

49 91 However, primary healthcare is not yet fully prepared to deal with patients with dementia(5). It is  
50  
51 92 thus essential to increase the capacity of primary healthcare clinicians to care for this population  
52  
53  
54  
55  
56  
57

1  
2  
3 93 and to better coordinate care between primary healthcare, memory clinics and community  
4  
5 94 organizations (e.g. the Alzheimer Society, home-based nursing services and home care services).  
6  
7

8  
9 95 To this end, several Canadian provinces have made considerable efforts to develop and implement  
10  
11 96 Collaborative Care Models (collCM) leveraging on the existence of interdisciplinary primary care  
12  
13 97 teams(6-11). CollCM specific to dementia care have been implemented at different levels across  
14  
15 98 Canadian jurisdictions.  
16

17  
18  
19 99 These primary care-based collCM share the same visions and objectives, which are described in  
20  
21 100 Supplemental File 1. Overall, they aim to provide timely, patient-centered, comprehensive, and  
22  
23 101 continuous inter-professional care for persons with dementia, including health promotion,  
24  
25 102 detection, diagnosis, treatment, management and coordination of care throughout the course of the  
26  
27 103 disease using standardized clinical tools. This could be achieved through collaboration between  
28  
29 104 family physicians, nurses and other healthcare professionals working in Family Medicine Groups  
30  
31 105 or Family Health Teams (FMG/FHT) along with their community partners and specialists as  
32  
33 106 needed. Primary healthcare teams are becoming the hub of integrated care, where specialized  
34  
35 107 services support primary care professionals in managing this complex population. However, the  
36  
37 108 characteristics of these models, such as the processes and activities performed for persons with  
38  
39 109 dementia and their caregivers, varies from one FMG/FHT to another. These interventions have  
40  
41 110 shown promising results in terms of feasibility, clinician participation, and satisfaction(6-8).  
42  
43  
44  
45

46  
47 111 The implementation of collCM in Canada represent natural experiments, offering opportunities to  
48  
49 112 evaluate innovative approaches and to identify determinants of better quality of care for patients  
50  
51 113 with dementia.  
52  
53  
54  
55  
56  
57

1  
2  
3 114 The overall objective of our research program is to identify key factors for the application of  
4  
5 115 recommendations for dementia care and successful collCM implementation, and to facilitate  
6  
7  
8 116 dissemination and scale-up of dementia best practices. Our program will be the first provincial and  
9  
10 117 cross jurisdictional evaluation of primary care collCM for patients living with dementia,  
11  
12

13 118 The specific objectives are:  
14  
15

- 16 119 1. To determine the association between potential key factors (organizational characteristics  
17  
18 120 and clinician characteristics) and outcomes of successful dementia management in primary  
19  
20 121 care: quality of care, continuity of care, and medications management  
21  
22  
23 122 2. To examine how collCM have been developed and implemented and have evolved over  
24  
25 123 time to improve care of patients with dementia and their caregivers  
26  
27  
28 124 3. To understand the link between implementation strategies, characteristics of collCM and  
29  
30 125 quality of dementia care  
31  
32  
33

## 34 126 **METHODS**

35  
36 127 To reach our objectives, we will use a convergent mixed methods design(12): A quantitative  
37  
38 128 observational study using chart review and questionnaires to answer objective 1, and a qualitative  
39  
40 129 descriptive study using interviews to answer objective 2. The results from both studies will be  
41  
42 130 conducted in parallel and further integrated to answer objective 3.  
43  
44  
45

### 46 131 **Patient and Public Involvement**

47  
48 132 Our research program employs an integrated knowledge exchange strategy(13), with decision-  
49  
50 133 makers/managers, clinicians, and patients/caregivers representatives throughout the entire study  
51  
52 134 (Figure 1). These stakeholders were involved in defining the research questions and study design  
53  
54  
55  
56  
57

1  
2  
3 135 via a series of meetings using an organizational participatory approach(14). They will further be  
4  
5 136 involved in interpretation of results and dissemination of study results.  
6  
7  
8

## 9 137 **OBSERVATIONAL STUDY**

### 10 138 **Main objective**

11  
12  
13 139 To determine the association between potential key factors (organizational characteristics and  
14  
15 140 clinician characteristics) and outcomes of successful dementia management in primary care:  
16  
17 141 quality of dementia care, continuity of care and medications management.  
18  
19  
20

### 21 142 **Site selection**

22  
23 143 To purposively identify FMGs/FHTs who have implemented collCM, we contacted researchers,  
24  
25 144 clinicians, and decision-makers in gerontology, geriatrics and primary care at the provincial and  
26  
27 145 federal levels through our professional contact lists and during national conferences. We selected  
28  
29 146 sites from three provinces (Ontario, Quebec, and New Brunswick), with various collCM and levels  
30  
31 147 of implementation to maximize the diversity of collCM characteristics.  
32  
33  
34  
35

### 36 148 **Design**

37  
38 149 This is an observational study with a cross-sectional design using a chart review and  
39  
40 150 questionnaires. A chart review was conducted for patients 75 years old and older with a diagnosis  
41  
42 151 of dementia. We chose 75 years old as the age cut-off since dementia is highly prevalent in this  
43  
44 152 population(15), thus increasing the number of eligible charts. One retrospective chart review was  
45  
46 153 conducted in each site. The study period is 9 months, either from October 1<sup>st</sup>, 2014 to July 1<sup>st</sup>, 2015  
47  
48 154 or October 1<sup>st</sup>, 2015 to July 1<sup>st</sup>, 2016. The target population is all patients 75 years old and older  
49  
50 155 with a diagnosis of dementia who had at least one visit to the site during the study period.  
51  
52  
53  
54  
55  
56  
57

1  
2  
3 156 Questionnaires were sent to the medical directors and clinicians from each site between 2014-2018  
4  
5 157 to be completed within one year of the site's chart review.  
6  
7

8  
9 158 **Chart review**

10  
11  
12 159 *Outcomes*

13  
14 160 The primary outcome for the observational study is the quality of dementia care. Because no such  
15  
16 161 measure exists, we developed our own **Quality of Dementia Follow-Up Score**, based on the  
17  
18 162 recommendations and guidelines from a number of expert groups, such as ACOVE-3(16, 17),  
19  
20 163 CCCDTD(4), and others sources(9, 18). This score is comprised of 10 indicators of quality of  
21  
22 164 follow-up for dementia and has been further validated in a pilot study (Table 1)(19). These  
23  
24 165 indicators were selected by our researchers and experts in dementia based on their concordance  
25  
26 166 with Canadian clinical recommendations(4) and their feasibility to be measured through a chart  
27  
28 167 review. Patient's eligibility for each indicator were assessed over the patient's entire medical chart.  
29  
30 168 Based on the validated ACOVE approach, a score will be calculated for each patient by summing  
31  
32 169 the number of indicators performed during the study period by the FMG/FHT divided by the  
33  
34 170 number of eligible indicators for that patient.  
35  
36  
37  
38  
39  
40  
41  
42  
43  
44  
45  
46  
47  
48  
49  
50  
51  
52  
53  
54  
55  
56  
57



171 **Table 1** Summary of variables included in the analyses for the observational study with data source

| Type                      | Variable                      | Description                                                                                                                                                                                                                                                                                                                         | Chart review 2014-2016 | Organizational questionnaire 2016-2018 | Clinicians' questionnaire 2014-2017 |
|---------------------------|-------------------------------|-------------------------------------------------------------------------------------------------------------------------------------------------------------------------------------------------------------------------------------------------------------------------------------------------------------------------------------|------------------------|----------------------------------------|-------------------------------------|
| <b>Primary outcome</b>    | Quality of dementia follow-up | 10 ACOVE indicators:<br>Cognitive testing<br>Functional status,<br>Behavioral and psychological symptoms of dementia<br>Weight<br>Caregiver needs<br>Driving status<br>Home care needs<br>Community service needs (e.g., Alzheimer Society)<br>Absence of anticholinergic medication and management of dementia medications (19)    | X                      |                                        |                                     |
| <b>Secondary outcomes</b> | Continuity of primary care    | Number of visits to the FMG/FHT; the number of notes, whether or not they were related to dementia, recorded in the charts by the FMG/FHT health professionals; the proportion of patients who have at least two visits to any clinician in the same FMG/FHT during the time period                                                 | X                      |                                        |                                     |
|                           | Medications management        | Proportion of patients with dementia who are treated with dementia medication such as cholinesterase inhibitors or Memantine; the proportion of new dementia medications prescribed or initiated; the proportion of new dementia medications initiated by family physician; the proportion of new dementia medications initiated by | X                      |                                        |                                     |

|                              |                                                              |                                                                                                                                                                                                                                                                                                                                                                                                                                                                                                        |  |   |   |
|------------------------------|--------------------------------------------------------------|--------------------------------------------------------------------------------------------------------------------------------------------------------------------------------------------------------------------------------------------------------------------------------------------------------------------------------------------------------------------------------------------------------------------------------------------------------------------------------------------------------|--|---|---|
|                              |                                                              | specialists; and the proportion of patients who are treated with anti-psychotics during the period                                                                                                                                                                                                                                                                                                                                                                                                     |  |   |   |
| <b>Explanatory variables</b> | Organizational Best Practices for Dementia Score             | See Henein et al. (20)<br><br>Domains include:<br><br>Leadership within the interdisciplinary primary care clinic, Financial Support, Support from cognition specialists, Training, Clinical information systems, Coordination and Continuity within the interdisciplinary primary care clinic, Caregiver support and involvement, Access to and coordination with home and community services, Coordination with Hospital                                                                             |  | X |   |
|                              | Index of Conformity to an Ideal Type of primary care setting | See Levesque et al. (21)<br><br>Domains include:<br>Vision, structure, resources, practice                                                                                                                                                                                                                                                                                                                                                                                                             |  | X |   |
|                              | Clinician KAP Scores                                         | See Arsenault-Lapierre et al. (22, 23)<br><br>Physicians' and nurses' perceived competency and knowledge related to dementia; the physicians' and nurses' attitudes toward dementia; the physicians' practices in terms of cognitive evaluation; the physicians' attitude toward their collaboration with other FMGs/FHT healthcare professionals; and the nurses' satisfaction with the support from secondary and tertiary care services and the physicians' and nurses' attitudes toward the collCM |  |   | X |

|                    |                                 |                                                                                                                                                                                                       |   |   |  |
|--------------------|---------------------------------|-------------------------------------------------------------------------------------------------------------------------------------------------------------------------------------------------------|---|---|--|
| <b>Confounders</b> | Patients' characteristics       | Age, sex, co-morbidities (number of medications)                                                                                                                                                      | X |   |  |
|                    | FMG/FHT demographic information | number of registered patients, public/private, proximity to memory clinic, university affiliation, Rural/urban and socio-economic area based on the FMG/FHT postal code, percentage of older patients |   | X |  |

172

173 We will also examine two secondary outcomes: a) **continuity of primary care** for patients with  
 174 dementia (including the number of visits to the FMG/FHT; the number of notes, whether or not  
 175 they were related to dementia, recorded in the charts by the FMG/FHT health professionals; the  
 176 proportion of patients who have at least two visits to any clinician in the same FMG/FHT during  
 177 the study period); and b) **medications management** (including proportion of patients with  
 178 dementia treated with dementia medications such as cholinesterase inhibitors or Memantine;  
 179 proportion of new dementia medications prescribed or initiated; proportion of new dementia  
 180 medications initiated by family physician; proportion of new dementia medications initiated by  
 181 specialists; and proportion of patients treated with anti-psychotics during the study period).

### 182 *Patient characteristics*

183 The age, sex, type of dementia, living status and comorbidities of each patient were collected  
 184 through the chart review. The number of medications was used as a proxy for comorbidities(24).

### 185 *Data collection procedure*

186 Patient charts were randomly selected among a list of registered patients 75 years and older with  
 187 a dementia diagnosis. Data were collected by research assistants from patients' charts in a  
 188 customized and secure, web-based database. An instruction manual for assessing each indicator

1  
2  
3 189 that needed to be collected through the chart review was prepared and tested. To further ensure the  
4  
5 190 quality of the data collection, all the research assistants who reviewed patient charts were trained  
6  
7  
8 191 by a single supervisor, a research nurse, who answered any questions that arose throughout the  
9  
10 192 chart review process.

### 13 193 **Organizational questionnaire**

15 194 Our organizational questionnaire has two parts. The first part assesses the adherence to various  
16  
17  
18 195 components of dementia care recommendations in each site. We adapted a questionnaire  
19  
20 196 developed to assess the implementation of chronic care model in the US patient centered medical  
21  
22 197 home, the PCMH-A questionnaire(25), to the Canadian context using the Canadian  
23  
24 198 recommendations on dementia(26). An overall score, called the **Organizational Best Practices**  
25  
26 199 **for Dementia Score** ranging from 1 to 100 will be derived from the questions, where a higher  
27  
28  
29 200 score signifies better adherence to best practices according the recommendations(20).

31  
32 201 The second part of the questionnaire assesses site demographic information (Table 1) and primary  
33  
34 202 care organizational site characteristics. We adapted a validated questionnaire developed by the  
35  
36  
37 203 Institut national de santé publique du Québec(21) to the Canadian context. From this  
38  
39 204 questionnaires four domain scores (structure, vision, resources, and practice), we will derive a  
40  
41 205 score called the **Index of Conformity to an Ideal Type of primary care setting (ICIT)**, where  
42  
43 206 a higher score indicates a better organized primary care setting (e.g. higher ETP physicians, access  
44  
45  
46 207 to electronic medical records, after-hours care, etc.)(21).

47  
48  
49 208 Content validity of our organizational questionnaire has been conducted with eight experts and 11  
50  
51 209 medical directors across the three provinces and described(20). Our questionnaire was developed  
52  
53  
54 210 in French and later translated into English and back translated into French to ensure equivalency

1  
2  
3 211 between the two versions. Our organizational questionnaire was mailed in 2017-2018 to the  
4  
5 212 medical directors at each site, along with two copies of the consent forms and a pre-stamped  
6  
7  
8 213 envelope. Multiple reminders were made to increase the completion rate. Data was entered by a  
9  
10 214 research assistant and 10% of questionnaires were checked for reliability of data entry.  
11  
12

### 13 215 **Clinicians' questionnaires**

14  
15 216 Two clinicians' questionnaires, one for the physicians/nurse practitioners and one for the nurses  
16  
17 217 and other healthcare professionals working in the participating FMG/FHT, will be used to assess  
18  
19 218 their knowledge, attitudes and practices(27) toward dementia care and toward the collCM(22, 23).  
20  
21 219 Both questionnaires have 83 questions, including demographic questions. From these  
22  
23 220 questionnaires, nine **Clinician KAP Scores** are calculated: the physicians/NPs' and nurses'  
24  
25 221 perceived competency and knowledge related to dementia; their attitudes toward dementia care  
26  
27 222 and their attitudes toward the collCM; the physicians' practices in terms of cognitive evaluation;  
28  
29 223 the physicians' attitude toward their collaboration with other FMG/FHT healthcare professionals;  
30  
31 224 and the nurses' satisfaction with the support from secondary and tertiary care services.  
32  
33  
34  
35  
36

37 225 Both questionnaires have been developed and validated and are available in French and in  
38  
39 226 English(22, 23). The questionnaires were distributed to every family physician, nurse practitioner  
40  
41 227 and nurse practicing at participating sites in 2014-2017. Multiple reminders were made to increase  
42  
43 228 the completion rate. Data were entered by a research assistant and 10% of questionnaires were  
44  
45 229 checked for reliability of data entry.  
46  
47  
48  
49  
50  
51  
52  
53  
54  
55  
56  
57

## 230 **Explanatory variables**

231 Explanatory variables in this study will be the scores derived from the organizational and clinician  
232 questionnaires; specifically, the Organizational Best Practices for Dementia Score, ICIT score and  
233 Clinician KAP scores.

## 234 **Analysis**

### 235 *Descriptive analyses*

236 A descriptive summary of all study variables (outcomes, explanatory variables, patient and site  
237 characteristics) will be conducted overall and by site. For continuous variables, means and standard  
238 deviations will be used for normally distributed variables; medians and interquartile ranges will be  
239 used for skewed variables. For binary or categorical variables, proportions will be reported.

### 240 *Statistical modelling*

#### 241 *Modelling for primary outcome -Quality of Dementia Follow-Up Score*

242 To determine the association between the organizational and clinician scores with the quality of  
243 dementia follow-up, we will construct a linear mixed effects model using the data collected  
244 through the chart review, organizational and clinician questionnaires, and site demographic  
245 information. The unit of analysis will be the patient. The site ID will be treated as random effect  
246 in the model, which will account for the clustering of patients within FMG/FHT. All other  
247 independent variables will be treated as fixed effects. Independent variables will include the  
248 explanatory variables (Organizational Best Practices for Dementia and Clinician KAP scores). The  
249 model will also adjust for potential confounding variables including patient characteristics (age,  
250 sex, number of medications) and FMG/FHT demographic characteristics (number of registered  
251 patients, public/private, proximity to memory clinic, university affiliation, rural/urban based on

1  
2  
3 252 the FMG/FHT postal code, percentage of older patients). See Table 1 for a summary of the  
4  
5 253 variables.

### 8 254 *Modelling for secondary outcomes*

10 255 Similar models will be constructed to explore the association between the explanatory variables  
12  
13 256 (Organizational Best Practices for Dementia, ICIT score and Clinician KAP scores) and the  
14  
15 257 secondary outcomes (continuity of care and medications management) from the chart review while  
16  
17 258 controlling for the same site-level and patient-level characteristics.

### 21 259 *Sample Size and Power Determination*

23 260 We based the sample size and power calculation for this study on the primary outcome of quality  
24  
25 261 of dementia follow-up. As the study was not powered on the secondary outcomes, analyses for  
26  
27 262 secondary outcomes will be considered exploratory in nature. Statistically significant findings for  
28  
29 263 secondary outcomes will be interpreted as hypothesis generating.

33 264 To maximize our effective sample size, we strove to maximize the number of FMG/FHT that could  
34  
35 265 be included in the study based on time and budget constraints while also ensuring that an adequate  
36  
37 266 effect size for the statistical models could be detected. With these constraints in mind, we  
38  
39 267 determined that we would be able to include 28 sites in the study. Using an estimated Intraclass  
40  
41 268 Correlation Coefficient (ICC) of 0.16 based on our pilot data, we established that 30 patients from  
42  
43 269 each site would allow us to detect a small effect (Cohen's  $f^2 = 0.05$ ) due to a single factor, with  
44  
45 270 80% power. This effect size corresponds to an  $R^2 = .038$ , meaning that we could detect  
46  
47 271 explanatory variables that account for at least 3.8% of the variability in the dementia follow-up  
48  
49 272 scores. Thus, the number of patients required for this study was calculated to be 28 sites x 30 charts  
50  
51 273 = 840 patients.

## 274 **IMPLEMENTATION STUDY**

### 275 **Main objective**

276 To examine how collCM have been developed, implemented, and evolved over time to improve  
277 care of patients with dementia and their caregivers in Canada.

### 278 **Design**

279 We use a qualitative descriptive design(28). A qualitative descriptive design is appropriate when  
280 the aim is to provide an in-depth description of a phenomenon, and when the phenomenon is of  
281 particular relevance to clinicians and policy-makers(28).

### 282 **Sites selection**

283 From the 28 sites selected in the observational study, 22 sites were sampled according to a  
284 purposeful maximum variation sampling method based on the type of collCM and rural/urban  
285 location.

### 286 **Data sources and target populations**

287 Two sources of data will be used on different target populations.

#### 288 *Organizational questionnaire*

289 The data collected from the organizational questionnaire will provide descriptive information  
290 about each primary care site including the patient population, human resources, and funding  
291 model, thus providing important contextual information (see observational study above). Primary  
292 care sites will be asked to complete the organizational questionnaire again in 2020 to determine  
293 any changes in these categories.



1  
2  
3 294 *Interviews*  
4

5 295 In-depth semi-structured interviews(29) will provide the primary source of data for the  
6  
7 296 implementation study.  
8  
9

10  
11 297 Interviews were conducted in 2017 and 2019 with three clinicians (one family physician, one  
12  
13 298 nurse, and one other health professional) involved in delivering care and with one leader who  
14  
15 299 implemented the collCM within each site. In addition, interviews will be conducted in both 2017  
16  
17 300 and 2020 with at least one representative from each provincial Ministry of Health including project  
18  
19 301 managers. In 2019, interviews with two patients from each FHT/FMG were conducted. Physicians  
20  
21 302 identified patients who were capable to participate in an interview, and for whom participation in  
22  
23 303 an interview would not be detrimental to the patient (e.g., it would not cause undue stress or  
24  
25 304 anxiety). This determination was based on the physician's clinical expertise and knowledge of the  
26  
27 305 patient. If the patient preferred, interviews were conducted together with their family/friend  
28  
29 306 caregiver. Patients and caregivers were asked about their experiences with the collCM in their  
30  
31 307 FHT/FMG (i.e., what they enjoyed/found helpful about their experience, what they have not  
32  
33 308 enjoyed/not found helpful, and how their experience could be improved). We interviewed a  
34  
35 309 convenient sample of physicians, nurses and other professionals involved in the day-to-day work.  
36  
37 310 Interviewing this broad range of individuals will enable all aspects of the models to be examined  
38  
39 311 and ensure that all components of the specific objectives will be addressed. The data collection  
40  
41 312 timeline is described in Table 2.  
42  
43  
44  
45  
46  
47

48 313 Overall, there will be a total of 201 interviews conducted. Interview guides have been developed  
49  
50 314 based on previous work conducted by our team (not yet published). The interviews will be  
51  
52 315 conducted mainly by phone for the clinicians, managers and government representatives, and in  
53  
54  
55  
56  
57

316 person (e.g., at home) for patients. All the interview guides will be pilot tested for refinement and  
 317 validation.

318 Table 2: Data collection timeline for implementation study

| <b>Data Source and Target Population</b>  | <b>Date</b>              |
|-------------------------------------------|--------------------------|
| <b>Organizational questionnaire</b>       | 2017-2018; repeated 2020 |
| <b>Interviews with Patients</b>           | 2019                     |
| <b>Interviews with Ministry of Health</b> | 2017 and 2020            |
| <b>Interviews with Clinicians</b>         | 2017 and 2019            |

### 320 Analysis

321 Interviews will be transcribed and entered into NVivo12. Responses to open-ended questions from  
 322 the organizational questionnaire will also be entered into NVivo12 to allow for analysis of all of  
 323 the qualitative data. Data will be analyzed using conventional content analysis(30, 31). Interview  
 324 transcripts will be independently coded by two team researchers, who will compare codes to agree  
 325 on a codebook for the remaining transcripts. Codes will be collapsed into meaningful themes.

326 Using the theoretical framework of co-creation of innovation in healthcare(3) we will assess:

- 327 1) The theoretical basis for the model (objectives, vision, mechanisms of action, target  
 328 population, etc.) and its components presently implemented (actions; material,  
 329 financial and human resources; organizational structure; clinical interventions;  
 330 timeline; frequency of the actions);

1  
2  
3 331 2) Components of the collCM already in place and those still to be implemented;  
4  
5 332 factors at the provincial, organizational, clinical team and community levels that  
6  
7  
8 333 can explain variations in the extent of implementation;  
9

10  
11 334 3) *Barriers/Facilitators to Scale-up*: Factors that will be considered in this part of the  
12  
13 335 analysis will include strategy of change management, resource mobilization,  
14  
15 336 training, leadership and the role of champions. Data from interviews will be used  
16  
17 337 in this part of the analysis.  
18  
19

20  
21 338 Results from this analysis will not only reveal the common processes through which collCM are  
22  
23 339 co-created but will also explain how models have been tailored to meet the needs of the local  
24  
25 340 partners and contexts.  
26  
27

### 28 341 *Strategies to Enhance Rigor*

29  
30  
31 342 Several strategies will be used to enhance rigor. First, an audit trail of analytical decisions will be  
32  
33 343 kept using ‘memoing’ in NVivo10. Second, triangulation of data sources and researchers will be  
34  
35 344 carried out. Triangulation enhances the validity of the findings and also provides a more  
36  
37 345 comprehensive understanding of the phenomenon being studied. Triangulation of data sources  
38  
39 346 included the use of interviews with multiple groups (clinicians, patients and caregivers, policy-  
40  
41 347 makers) as well as the organizational questionnaire. Triangulation of researchers included having  
42  
43 348 multiple researchers involved in the coding and interpretation of the interview transcripts.  
44  
45  
46  
47

### 48 349 **Integration of the implementation and the observational studies**

49  
50  
51 350 To understand the link between implementation strategies, characteristics of models of care and  
52  
53 351 quality of dementia follow-up (objective 3), the data and results from both studies will be  
54  
55 352 integrated, which will provide a rich portrait at the site level(12). We will merge qualitative and  
56  
57

1  
2  
3 353 quantitative data to compare them. We will develop a full data profile for each site, allowing the  
4  
5 354 joint review of both data types by creating a new dataset(32). First, for the quantitative data, a table  
6  
7  
8 355 of variables for each FMG/FHT will be developed and compared with the overall results across  
9  
10 356 sites. Second, for the qualitative data, summaries of facilitators and barriers for the successful  
11  
12 357 implementation of collCM will be developed for each FMG/FHT. Third, these data will be  
13  
14 358 integrated using a matrix(12), whereby the columns will represent sites and rows will represent  
15  
16 359 findings. This will allow us to draw conclusions on the link between implementation strategies,  
17  
18  
19 360 characteristics of models of care and quality of dementia follow-up.  
20  
21  
22

### 23 361 **ETHICS AND DISSEMINATION**

24  
25 362 This study is conducted using the principles of integrated knowledge transfer(33). Much of this  
26  
27 363 work is completed through three active councils: a Provincial Council with partners in the three  
28  
29 364 provinces where we collect data, a Canadian Council with stakeholders across all provinces, and  
30  
31 365 an International Council with researchers from many middle and high income countries (the  
32  
33 366 Netherlands, the United-States of America, Mexico, the United Kingdom, France, Israel, China,  
34  
35 367 Japan and Pan American Health Organization/World Health Organization). Our dissemination  
36  
37  
38 368 plan includes the following steps. First, we will present clinical sites with their individual results.  
39  
40  
41 369 Second, we will present results to our councils in order to understand the successful elements that  
42  
43 370 build capacity in primary care to support the care of persons with dementia, to allow the different  
44  
45 371 provinces to share successful elements of their Alzheimer plans and strategies, and finally to ensure  
46  
47  
48 372 dissemination and implementation of best practices across Canada and internationally.  
49  
50

51 373 Our results will also be disseminated through peer-reviewed journals, conference presentations,  
52  
53 374 and social, broadcast, and print media. Authorship will be determined based on the International  
54  
55 375 Committee of Medical Journal Editors recommendations.  
56

1  
2  
3 376 This multicentre study has received Research Ethics Board (REB) approval from the Centre  
4  
5 377 Intégré Universitaire de Santé et de Service Social (CIUSSS) du Centre-Ouest-de-l'île-de-Montréal  
6  
7 378 and from each Centre Intégré de Santé et de Service Social (CISSS) or CIUSSS involved in  
8  
9  
10 379 Quebec; from the REB at the University of Waterloo; and the REB from Université de Moncton  
11  
12 380 and both regional health boards in New Brunswick. Amendments to the protocol will be  
13  
14 381 communicated to all the REB involved and to all regional sites. In addition, each site will give  
15  
16 382 their approval to participate in the study. The director of each site will grant our team permission  
17  
18 383 to access patients' charts. All individuals completing the questionnaires and individual face-to-  
19  
20 384 face interviews will sign a consent form prior to participating (Supplemental File 2). The patients'  
21  
22 385 capacity to consent was evaluated by the clinicians and research team. Personal information for  
23  
24 386 the patient's charts (file number) was collected but will not be shared to the research team and will  
25  
26 387 be kept 10 years at the sites. Names of clinicians and medical directors from the sites were collected  
27  
28 388 to ensure high completion rate but will be kept separately from the dataset.  
29  
30  
31  
32  
33

## 34 389 **DISCUSSION**

35  
36  
37 390 Ensuring accessibility to diagnosis, treatment and management throughout the course of dementia  
38  
39 391 is a very significant challenge worldwide. In order to provide comprehensive care to patients and  
40  
41 392 their caregivers, enhancing primary care-based dementia care is the way forward.  
42  
43  
44

45 393 Our program is the first to examine multiple models for patients living with dementia in the  
46  
47 394 primary care setting across different Canadian jurisdictions. It will allow us to identify key factors  
48  
49 395 for good quality of care, as reflected by the application of guidelines, and successful collCM  
50  
51 396 implementation strategies.  
52  
53  
54  
55  
56  
57

1  
2  
3 397 Our study program will provide valuable information for other Canadian jurisdictions interested  
4  
5 398 in implementing a collCM. It will provide important and actionable results to provide  
6  
7 399 transformative change both at the local and national levels. The results will be used to support the  
8  
9 400 dissemination and scale up of best dementia primary care practices. This study will produce timely  
10  
11 401 and rigorous measures of quality of care in primary dementia care and its determinants. The results  
12  
13 402 of this study will be used to refine the development of the National Strategy for Alzheimer's  
14  
15 403 Disease and Other Dementias Act in Canada(34). We work closely with the Canadian Academy  
16  
17 404 of Health Science, who was mandated by the Minister of Health of Canada through the Public  
18  
19 405 Health Agency of Canada, to provide an evidence-informed assessment on the state of knowledge  
20  
21 406 to help develop the national strategy(35).  
22  
23  
24  
25  
26  
27

## 28 407 **DECLARATIONS**

### 31 408 **Consent for publication**

32  
33  
34 409 Not applicable.  
35  
36  
37

### 38 410 **Availability of data and materials**

39  
40 411 Dataset will be accessible to the investigators of the study and will not be made public. Access to  
41  
42 412 full protocol and statistical code will remain accessible to the investigators of the study only and  
43  
44 413 may be available upon request by contacting the principal investigator (Dr. Isabelle Vedel).  
45  
46 414 Vancouver authorship eligibility guidelines will be used throughout the study.  
47  
48  
49

### 50 415 **Competing interests**

51  
52 416 The authors declare that they have no competing interests.  
53  
54  
55  
56  
57

## 417 **Funding**

418 The pilot study, the development and validation of questionnaires and this study are funded by two  
419 operating grants: Pfizer - Fonds de recherche Québec Santé (FRQS) – Ministère de la Santé et des  
420 Services Sociaux (2013-2016 #28859) and the Canadian Consortium for Neurodegeneration and  
421 Aging (CCNA 2014-2019). The Canadian Consortium on Neurodegeneration in Aging is  
422 supported by a grant from the Canadian Institutes of Health Research with funding from several  
423 partners. The funding bodies did not play any role in the design of the study and in writing the  
424 manuscript.

## 425 **Authors' contributions**

426 IV, CM, YC, SP, GAL, NS, CGS, RS and HB made substantial contributions to the conception or  
427 design of the study and drafting the manuscript. All other authors revised the manuscript critically  
428 for important intellectual content.

## 429 **Acknowledgements**

430 *The Research on Organization of Healthcare Services for Alzheimer's (26) Canadian Team for*  
431 *Healthcare Services/System Improvement in Dementia Care – Phase 1 is composed of the co-*  
432 *principal investigators (Howard Bergman from McGill University, Isabelle Vedel from McGill*  
433 *University, Paula Rochon from Women's College Research Institute, Carrie McAiney from*  
434 *University of Waterloo, Yves Couturier from University de Sherbrooke, Sarah Pakzad from*  
435 *Université de Moncton, Susan Bronskill Institute for Clinical Evaluative Sciences, and Erin*  
436 *Strumpf from McGill University).*

437 Collaborating Authors: We want to acknowledge the contribution of all the members of our team,  
438 the *Research on Organization of Healthcare Services for Alzheimer's (26) Canadian Team for*

1  
2  
3 439 *Healthcare Services/System Improvement in Dementia Care – Phase I*, including all investigators  
4  
5 440 *(Michele Aubin from Université Laval, Roxane Borges da Silva from Université de Montreal,*  
6  
7 441 *Edeltraut Kroger from Université Laval, Danielle St-Laurent from INSPQ, Valerie Emond from*  
8  
9 442 *INSPQ, Paul-Emile Bourque from University of Moncton, Geoff Anderson from ICES, Mabelle*  
10  
11 443 *Wilchesky from McGill University, Dominique Gagnon from UQAT, Charo Rodriguez from*  
12  
13 444 *McGill University, Linda Lee, Pamela Baxter, Sharon Kaasalainen from McMaster University,*  
14  
15 445 *Sherry Dupuis from University of Waterloo, Liette Lapointe from McGill University, Vladimir*  
16  
17 446 *Khanassov from McGill University, Jennifer Ingram from Trent University, Dallas Seitz from*  
18  
19 447 *Queen’s University), our students (Maude-Émilie Pépin from Université de Sherbrooke, Maxime*  
20  
21 448 *Guillette from Université de Sherbrooke, Nathalie Dame from Université de Sherbrooke, Frantz*  
22  
23 449 *Siméon from Laurentian University, and Noémie Nicol-Clavet from Université de Sherbrooke),*  
24  
25 450 *and the members of our coordinating center, responsible for the data management (Marine*  
26  
27 451 *Hardouin, Mary Henein, Lucie Vaillancourt Mélanie LeBerre, Rebecca Rupp, Muriel Gueriton*  
28  
29 452 *from McGill University, Maude-Émilie Pépin from Université de Sherbrooke, Deana Huntsbarger*  
30  
31 453 *from Kawartha Centre, and Sheri Burns from McMaster University).*  
32  
33  
34  
35  
36  
37  
38

## 454 **REFERENCE LIST**

- 455 1. Alzheimer Society of Canada. *Rising tide: the impact of dementia on Canadian society*. Toronto,  
456 ON 2010.
- 457 2. World Health Organization. *Dementia: a public health priority* 2012 December 1, 2014 Available  
458 from: [https://extranet.who.int/agefriendlyworld/wp-content/uploads/2014/06/WHO-Dementia-](https://extranet.who.int/agefriendlyworld/wp-content/uploads/2014/06/WHO-Dementia-English.pdf)  
459 [English.pdf](https://extranet.who.int/agefriendlyworld/wp-content/uploads/2014/06/WHO-Dementia-English.pdf).
- 460 3. Miller BF. *A national agenda for research in collaborative care: papers from the Collaborative Care*  
461 *Research Network Research Development Conference: Agency for Healthcare Research and Quality; 2011.*
- 462 4. *Third Canadian Consensus Conference on diagnosis and treatment of dementia* Montreal 2007  
463 [Available from: [http://www.ccdtd.ca/pdfs/Final\\_Recommendations\\_CCDTD\\_2007.pdf](http://www.ccdtd.ca/pdfs/Final_Recommendations_CCDTD_2007.pdf).
- 464 5. Pimlott NJ, Persaud M, Drummond N, Cohen CA, Silvius JL, Seigel K, et al. *Family physicians and*  
465 *dementia in Canada Part 1. Clinical practice guidelines: awareness, attitudes, and opinions*. *Canadian*  
466 *Family Physician*. 2009;55(5):506-7. e5.



- 1  
2  
3 467 6. Vedel I, Monette M, Lapointe L. Portrait des Interventions mises en place au sein des groupes de  
4 468 famille pour les patients avec des troubles cognitifs liés au vieillissement (TCV). Rapport présenté au  
5 469 ministère de la Santé et des Services sociaux du Québec (MSSS). 2012.
- 6  
7 470 7. Lee L, Hillier LM, Stolee P, Heckman G, Gagnon M, McAiney CA, et al. Enhancing Dementia Care:  
8 471 A Primary Care–Based Memory Clinic. *Journal of the American Geriatrics Society*. 2010;58(11):2197-204.
- 9 472 8. Moore A, Patterson C, White J, House ST, Riva JJ, Nair K, et al. Interprofessional and integrated  
10 473 care of the elderly in a family health team. *Canadian family physician*. 2012;58(8):e436-e41.
- 11 474 9. Ministère de la Santé et des Services Sociaux du Québec. Relever le défi de la maladie d'Alzheimer  
12 475 et des maladies apparentées : une vision centrée sur la personne, l'humanisme et l'excellence. Rapport  
13 476 du comité d'experts en vue de l'élaboration d'un plan d'action pour la maladie d'Alzheimer. Rapport  
14 477 présidé par le Professeur Howard Bergman 2009 [Available from:  
15 478 <http://publications.msss.gouv.qc.ca/msss/document-000869/>].
- 16 479 10. Government of Ontario, Ministry of Health and Long-Term Care, Ministry of Education (Early Years  
17 480 and Child Care). Developing Ontario's dementia strategy: a discussion paper. 2016.
- 18 481 11. Government of New Brunswick, Council on Aging. We are all in this together: An aging strategy  
19 482 for New Brunswick. 2017.
- 20 483 12. Pluye P, Hong QN. Combining the power of stories and the power of numbers: mixed methods  
21 484 research and mixed studies reviews. *Annual Review of Public Health*. 2014;35(1):29-45.
- 22 485 13. Jull J, Giles A, Graham ID. Community-based participatory research and integrated knowledge  
23 486 translation: advancing the co-creation of knowledge. *Implement Sci*. 2017;12(1):150.
- 24 487 14. Bush PL, Pluye P, Loignon C, Granikov V, Wright MT, Pelletier J-F, et al. Organizational participatory  
25 488 research: a systematic mixed studies review exposing its extra benefits and the key factors associated with  
26 489 them. *Implementation Science*. 2017;12(1):119.
- 27 490 15. Canadian Study of Health and Aging Working Group. Canadian Study of Health and Aging: Study  
28 491 methods and prevalence of dementia. *Canadian Medical Association Journal*. 1994;150(6):899-913.
- 29 492 16. Wenger NS, Roth CP, Shekelle P, ACOVE Investigators. Introduction to the assessing care of  
30 493 vulnerable elders-3 quality indicator measurement set. *Journal of the American Geriatrics Society*.  
31 494 2007;55(S2):S247-S52.
- 32 495 17. Wenger NS, Solomon DH, Amin A, Besdine RK, Blazer DG, Cohen H, et al. Application of Assessing  
33 496 Care of Vulnerable Elders-3 Quality Indicators to Patients with Advanced Dementia and Poor Prognosis.  
34 497 *Journal of the American Geriatrics Society*. 2007;55(S2):S457-S63.
- 35 498 18. Callahan CM, Sachs GA, LaMantia MA, Unroe KT, Arling G, Boustani MA. Redesigning systems of  
36 499 care for older adults with Alzheimer's disease. *Health Affairs*. 2014;33(4):626-32.
- 37 500 19. Vedel I, Sourial N, Arsenault-Lapierre G, Godard-Sebillotte C, Bergman H. Impact of the Quebec  
38 501 Alzheimer Plan on the detection and management of Alzheimer disease and other neurocognitive  
39 502 disorders in primary health care: a retrospective study. *CMAJ open*. 2019;7(2):E391-E8.
- 40 503 20. Henein M, Arsenault-Lapierre G, Godard-Sebillotte C, Sourial N, Vedel I. Organizational Best  
41 504 Practices for Dementia Questionnaire: Development and Validation. *McGill Family Medicine Studies*  
42 505 Online. 2020;15.
- 43 506 21. Levesque J-F, Pineault R, Provost S, Tousignant P, Couture A, Da Silva RB, et al. Assessing the  
44 507 evolution of primary healthcare organizations and their performance (2005-2010) in two regions of  
45 508 Québec province: Montréal and Montérégie. *BMC family practice*. 2010;11(1):95.
- 46 509 22. Arsenault-Lapierre G, Sourial N, Hardouin M, Pakzad S, Couturier Y, Bergman H, et al. Validation  
47 510 of a questionnaire for family physicians: knowledge, attitude, practice on dementia care. *Canadian Journal*  
48 511 *of Aging*. 2021;40(2).
- 49 512 23. Arsenault-Lapierre G, Sourial N, Vedel I. Measuring Knowledge, Practice, and Attitudes toward  
50 513 dementia in Nurses and other allied health professionals': Questionnaire Development and Validation.  
51 514 *McGill Family Medicine Studies Online*. 2020;15(e02).

- 1  
2  
3 515 24. Schneeweiss S, Seeger JD, Maclure M, Wang PS, Avorn J, Glynn RJ. Performance of comorbidity  
4 516 scores to control for confounding in epidemiologic studies using claims data. American journal of  
5 517 epidemiology. 2001;154(9):854-64.  
6 518 25. and TMCfHClaGHRI, Qualis Health. Safety Net Medical Home Initiative. The Patient-Centered  
7 519 Medical Home Assessment Version 4.0. Seattle, WA2014.  
8 520 26. Gauthier S, Patterson C, Chertkow H, Gordon M, Herrmann N, Rockwood K, et al.  
9 521 Recommendations of the 4th Canadian Consensus Conference on the Diagnosis and Treatment of  
10 522 Dementia. Canadian geriatrics journal. 2012;15(4):120-6.  
11 523 27. Kaplan SH, Greenfield S, Ware Jr JE. Assessing the effects of physician-patient interactions on the  
12 524 outcomes of chronic disease. Medical care. 1989:S110-S27.  
13 525 28. Sandelowski M. Whatever Happened to Qualitative Description. Research in Nursing and Health.  
14 526 2000;23:334-40.  
15 527 29. Patton MQ. Qualitative Research and Evaluation Methods (3rd edition): Sage Publications; 2002.  
16 528 30. Denzin NK, Lincoln YS. The Sage handbook of qualitative research: Sage; 2005.  
17 529 31. Hsieh H-F, Shannon SE. Three approaches to qualitative content analysis. Qualitative health  
18 530 research. 2005;15(9):1277-88.  
19 531 32. Caracelli VJ, Greene JC. Data analysis strategies for mixed-method evaluation designs. Educational  
20 532 evaluation and policy analysis. 1993;15(2):195-207.  
21 533 33. Grimshaw JM, Eccles MP, Lavis JN, Hill SJ, Squires JE. Knowledge translation of research findings.  
22 534 Implement Sci. 2012;7:50.  
23 535 34. Government of Canada, Ministry of Health, National Strategy on Alzheimer's Disease and other  
24 536 Dementias. An Act respecting a national strategy for Alzheimer's disease and other dementias. 2017.  
25 537 35. Canadian Academy of Health Sciences. Latest Assessments in Progress. CAHS Panel for the  
26 538 Assessment of Evidence and Best Practices for the development of a Canadian Dementia Strategy 2018  
27 539 [Available from: <http://www.cahs-acss.ca/latest-assessments-in-progress/>?

540

## 541 **Figure Legend**

542 **Figure 1:** Flowchart representing the research program design.



**Figure 1: Research program design**

Supplemental file 1. Main clinical, organizational and change management components of collaborative care models

|                                                                                                                                                                                                                                               |
|-----------------------------------------------------------------------------------------------------------------------------------------------------------------------------------------------------------------------------------------------|
| <b>Main clinical components of the collCM</b>                                                                                                                                                                                                 |
| - Early detection of cognitive decline and assessment by the FMG/FHT clinicians                                                                                                                                                               |
| - Early diagnosis of Alzheimer's disease and related disorders for typical cases; complicated cases to be referred to a specialist physicians                                                                                                 |
| - Explanation of the diagnosis to the patient and caregiver by the FMG/FHT physician followed by the nurse to assure that the information is well understood                                                                                  |
| - Initiation of pharmacological treatment by the FMG/FHT physician (for typical case) and follow-up by the FMG/FHT nurse, social worker, or pharmacist                                                                                        |
| - Identification of patient and caregiver's needs, preferences and expectations by the FMGs' clinicians                                                                                                                                       |
| - A dedicated FMG/FHT nurse case manager for each patient and caregiver dyad                                                                                                                                                                  |
| - Interdisciplinary care among FMG/FHT physicians, nurses, and other disciplines (e.g. social workers, pharmacists, etc.)                                                                                                                     |
| - Development of individualized care plans, promotion of self-care, management of multiple chronic diseases                                                                                                                                   |
| - Early involvement of community-based resources for patients and family caregivers (e.g. Alzheimer Society)                                                                                                                                  |
| - Deliberate and pro-active systematic follow up                                                                                                                                                                                              |
| - Care coordination among health and social services, community organizations and patient/family caregiver support groups                                                                                                                     |
| <b>Main organizational components of the collCM to support clinical processes</b>                                                                                                                                                             |
| - A strong training program for primary health care professionals                                                                                                                                                                             |
| - Collaborative chronic disease management based on a holistic approach to these complex patients and their caregivers, treating them as whole individuals within a socio-cultural context                                                    |
| - A strong partnership between FMG/FHT physicians and nurses with patients and their caregiver                                                                                                                                                |
| - Agreements to support collaboration between primary health care, secondary/tertiary clinicians and community-based health and social cared professionals, to offer support in a timely sensitive fashion                                    |
| - Timely access to specialists for Behavioral and Psychological Symptom of Dementia                                                                                                                                                           |
| - The use of standardized clinical tools and evidence-based protocols based on the Canadian Consensus Conference on Alzheimer Disease and Related Disorders (e.g. decisional algorithms, toolkits, guidelines, and clinical assessment tools) |
| - Shared care between FMG/FHT physicians and specialists for complex cases, such as the involvement of visiting specialists' clinicians                                                                                                       |
| - Coordination of patients transitions between the hospital and FMG/FHT (transitional care) to avoid re-hospitalization and emergency department visits                                                                                       |
| - Ongoing information exchange between professionals and settings (e.g. information technologies, interoperable electronic medical records)                                                                                                   |
| - Hiring of nurses and social worker in FMG/FHT as case manager                                                                                                                                                                               |

1  
2  
3 - Use of case discussion at interdisciplinary meetings, with the support of specialists if needed

4 **Main change management components of the collCM**

5  
6 - Identification of a champion

7  
8 - Creation of users' committee, such as caregivers and patients

9  
10 FMG/FHT: Family Medicine Group and/or Family Health Teams. collCM: collaborative care  
11 models  
12  
13  
14  
15  
16  
17  
18  
19  
20  
21  
22  
23  
24  
25  
26  
27  
28  
29  
30  
31  
32  
33  
34  
35  
36  
37  
38  
39  
40  
41  
42  
43  
44  
45  
46  
47  
48  
49  
50  
51  
52  
53  
54  
55  
56  
57  
58  
59  
60

**Supplemental File 2: Patients' consent form for Quebec****Consent form  
Patients and family caregivers' interview****Version 4, May 23<sup>rd</sup>, 2017**

**Title:** Assessing care models implemented in primary health care for persons with Alzheimer's disease and related disorders

**Investigator**

This study is headed by Dr. Isabelle Vedel, from Montreal Jewish General Hospital's Lady Davis Institute. This interview is supervised by Dr. Yves Couturier (Ph.D.), Professor, Health and Social Services Centre — University Institute of Geriatrics of Sherbrooke.

Before you agree to take part in this study, it is important that you read and understand the information in this consent form. Ask as many questions as you need to understand what is expected of you. You have no obligation to participate if you do not want to participate.

**Purpose of the study**

The Ministry of Health has recently implemented an intervention in the Quebec Family Medicine Groups (FMG). The purpose of this intervention is to improve the quality of care given to patients with cognitive impairments. In this study, we want to see how this intervention was implemented in the FMG and what its effects are on the quality of the care you receive.

This study was sponsored by the Canadian Institutes for Health Research (CIHR).

**What is expected of you**

If you agree to participate, we will ask you to do an interview, which will last a maximum of 60 minutes. We will ask you about your experience at the FMG and on the care you receive. Specifically, we will ask you about what you enjoy, what you find helpful about your experience, what you do not enjoy, what you do not find helpful, and how your experience could be improved.

**Possible risks associated with participation**

During the interview, we will ask you about the care you receive, your diagnosis, how it was given to you and your experience in general. Some questions may remind you of painful memories or stressful moments and trigger negative reactions.

**Benefits associated with participation and compensation**

Participating in this project gives you a chance to talk to a neutral outsider about your experience. It gives you a chance to think back on the good and not-so-good aspects of the care you are given and to take stock.

You will also receive a 20\$ gift-card to compensate for the time you have given this project.

**Voluntary participation and right to withdraw**

You have no obligation to participate. If you refuse, it will not have any consequences on your care and your refusal to participate will be kept confidential. Even if you agree to participate, you can decide not to do so at any time, without consequences or judgment. You do not even have to tell us your reasons. You can also choose not to answer some of the questions during the interview.

## Confidentiality and data management

To make sure that your identity will not be discovered by anyone outside our team, we have taken those steps:

- We will give you a personal identification number (PIN) as soon as you will be enrolled. It will be composed of random numbers. That way, your real name will never appear in our reports;
- We will use your PIN for all of our documents. The researcher is the only one who will have access to the list that links your name and your PIN;
- A member of our team will transcribe your interview;
- We will always present results on groups, never on specific individuals;
- The material we will use for the project (recordings, retranscriptions, researcher's notes...) will be kept on the research network of Sherbrooke University's Research Center on Aging, where Dr Couturier works. To get access to the data, we need a computer linked to the server. Every linked computer is protected by a password;
- Our team might participate in another project on the same subject. If so, your data may be re-used, but only the PIN protected data will be used, protecting your identity;
- All paper documents with your name (consent forms, ...) will be kept in a locked file cabinet, inside a locked suite, in McGill University's Department of Family Medicine. Only the principal investigators and their assistants will have access to these documents;
- Other paper data will be kept at all time in a locked drawer in room 2444 (which is also locked) in the Research Center on Aging. Only Yves Couturier (researcher in charge of the interviews) and his assistants will have access to it.
- We will present the results of our project in scientific journals and in different conferences, but it will not be possible to identify you specifically or to recognize you. The results will be presented in a general manner, with no link to your FMG or to your identity. We might, however, use a couple of quotes from your interviews. If so, we will use an alias;
- We will send a short summary of our results to interested participants. If you want to receive one, write down your postal or email address in the Signatures section;
- All data will be safely and permanently destroyed by November 2029, at the latest: the paper data will be shredded and we will ask the IT services to permanently delete the data on our computers and our servers. All your personal data will be destroyed;

For surveillance and monitoring purposes, your research file might be consulted by someone mandated by the West-Central Montreal Health's Research Ethics Committee, the establishment, or by someone mandated by authorized public bodies. Each of those persons and bodies are trained to make sure your identity is kept confidential.

For safety purposes, notably to enable us to communicate with you quickly, your name and surname, your contact information and the dates of the beginning and the end of your participation to the study will be kept for a year after the end of the study in a separate repertory maintained by the investigator in charge of the study.

## Additional information

If you have any questions about the study or your participation, please contact the principal investigator, Dr. Isabelle Vedel, at: 514-399-9107, or the email address: [isabelle.vedel@mcgill.ca](mailto:isabelle.vedel@mcgill.ca).

1  
2  
3 You can also contact Yves Couturier, who is in charge of the interviews, at: (819) 780-2220 ext.  
4 45143, or email address: [yves.couturier@usherbrooke.ca](mailto:yves.couturier@usherbrooke.ca)  
5

6 If you have any complaints or critics about the study, you can contact the Service Quality and  
7 Complaints Commissioner of the Montréal West Island IUHSSC at [rsteinberg@jgh.mcgill.ca](mailto:rsteinberg@jgh.mcgill.ca).

8 If you feel like you need more information and resources on dementia, you can ask your pivot  
9 nurse and/or contact the Alzheimer Society at: 514-369-7891, 1-888-636-6473 (41), or by email:  
10 [info@alzheimerquebec.ca](mailto:info@alzheimerquebec.ca). You can also visit their website:  
11 <http://www.alzheimer.ca/en/federationquebecoise>.  
12

13 If you feel isolated or if you want to talk about your situation, you can call the helpline Tel-Aînés  
14 at: 514-353-2463.  
15

16 If you are in a situation of abuse, neglect or mistreatment, you can call your clinic's ombudsman  
17 and/or call the helpline Ligne Aide Abus Aînés (1-888-489-2287).  
18

### 19 **Acknowledgments**

20 Your collaboration is precious and will enable us to successfully conduct this study. Thank you  
21 for taking the time to participate despite your heavy schedule.  
22  
23  
24  
25  
26  
27  
28  
29  
30  
31  
32  
33  
34  
35  
36  
37  
38  
39  
40  
41  
42  
43  
44  
45  
46  
47  
48  
49  
50  
51  
52  
53  
54  
55  
56  
57



1  
2  
3 *Assessing care models implemented in primary health care for persons with Alzheimer's disease and related disorders*  
4  
5

## 6 **Signatures**

7  
8 I, \_\_\_\_\_, freely consent to participate in the study named:  
9 « Assessing care models implemented in primary health care for persons with Alzheimer's disease  
10 and related disorders».  
11

12 I have read the above information and I have understood the purpose, nature, benefits, risks and  
13 discomforts associated with this study. I am satisfied with the explanations and answers the  
14 investigator has given me, if needed, regarding my participation in this project.  
15  
16

17  
18  
19 \_\_\_\_\_  
20 Participant's signature

\_\_\_\_\_ Date

21  
22  
23 A small summary of the results will be sent to the participants who will have written the address  
24 where they wish the document to be delivered. **The results won't be available until May 2019.**  
25 **If the address were to change before this date, feel free to give the new address to the**  
26 **investigator.**  
27  
28

29  
30  
31 \_\_\_\_\_  
32 Address (postal or electronic) where you want the summary to be sent.  
33  
34

35 I have explained to the participant the nature, benefits, risks and discomforts associated with the  
36 project. I have answered to the best of my knowledge the questions asked by the participant and I  
37 have made sure that he/she understood.  
38  
39

40  
41  
42 \_\_\_\_\_  
43 Investigator's signature

\_\_\_\_\_ Date

44  
45  
46  
47 **Other consent forms are available upon request by contacting the principal investigator (Dr. Isabelle Vedel)**  
48 **directly**  
49  
50
