# Supplementary material for: Assessing care models implemented in primary healthcare for persons with dementia: a mixed-methods study protocol
Source: PubMed Central journal article supplement — BMJ Open. 2020 May 15;10(5):e035916. doi: 10.1136/bmjopen-2019-035916 (PMC7232631; doi:10.1136/bmjopen-2019-035916), 2020-05-15
Supplement: bmjopen-2019-035916supp001.pdf [file bmjopen-2019-035916supp001.pdf]

Supplemental file 1. Main clinical, organizational and change management components of collaborative care models

|                                                                                                                                                                                                                                               |
|-----------------------------------------------------------------------------------------------------------------------------------------------------------------------------------------------------------------------------------------------|
| <b>Main clinical components of the collCM</b>                                                                                                                                                                                                 |
| - Early detection of cognitive decline and assessment by the FMG/FHT clinicians                                                                                                                                                               |
| - Early diagnosis of Alzheimer's disease and related disorders for typical cases; complicated cases to be referred to a specialist physicians                                                                                                 |
| - Explanation of the diagnosis to the patient and caregiver by the FMG/FHT physician followed by the nurse to assure that the information is well understood                                                                                  |
| - Initiation of pharmacological treatment by the FMG/FHT physician (for typical case) and follow-up by the FMG/FHT nurse, social worker, or pharmacist                                                                                        |
| - Identification of patient and caregiver's needs, preferences and expectations by the FMGs' clinicians                                                                                                                                       |
| - A dedicated FMG/FHT nurse case manager for each patient and caregiver dyad                                                                                                                                                                  |
| - Interdisciplinary care among FMG/FHT physicians, nurses, and other disciplines (e.g. social workers, pharmacists, etc.)                                                                                                                     |
| - Development of individualized care plans, promotion of self-care, management of multiple chronic diseases                                                                                                                                   |
| - Early involvement of community-based resources for patients and family caregivers (e.g. Alzheimer Society)                                                                                                                                  |
| - Deliberate and pro-active systematic follow up                                                                                                                                                                                              |
| - Care coordination among health and social services, community organizations and patient/family caregiver support groups                                                                                                                     |
| <b>Main organizational components of the collCM to support clinical processes</b>                                                                                                                                                             |
| - A strong training program for primary health care professionals                                                                                                                                                                             |
| - Collaborative chronic disease management based on a holistic approach to these complex patients and their caregivers, treating them as whole individuals within a socio-cultural context                                                    |
| - A strong partnership between FMG/FHT physicians and nurses with patients and their caregiver                                                                                                                                                |
| - Agreements to support collaboration between primary health care, secondary/tertiary clinicians and community-based health and social cared professionals, to offer support in a timely sensitive fashion                                    |
| - Timely access to specialists for Behavioral and Psychological Symptom of Dementia                                                                                                                                                           |
| - The use of standardized clinical tools and evidence-based protocols based on the Canadian Consensus Conference on Alzheimer Disease and Related Disorders (e.g. decisional algorithms, toolkits, guidelines, and clinical assessment tools) |
| - Shared care between FMG/FHT physicians and specialists for complex cases, such as the involvement of visiting specialists' clinicians                                                                                                       |
| - Coordination of patients transitions between the hospital and FMG/FHT (transitional care) to avoid re-hospitalization and emergency department visits                                                                                       |
| - Ongoing information exchange between professionals and settings (e.g. information technologies, interoperable electronic medical records)                                                                                                   |
| - Hiring of nurses and social worker in FMG/FHT as case manager                                                                                                                                                                               |

|                                                                                                   |
|---------------------------------------------------------------------------------------------------|
| - Use of case discussion at interdisciplinary meetings, with the support of specialists if needed |
| <b>Main change management components of the collCM</b>                                            |
| - Identification of a champion                                                                    |
| - Creation of users' committee, such as caregivers and patients                                   |

FMG/FHT: Family Medicine Group and/or Family Health Teams. collCM: collaborative care models
